# Supplementary material for: Water as a catalyst in the reaction of nitrous acid (HONO) and Criegee intermediate (CH2OO)
Source: Royal Society of Chemistry journal article supplement (doi:10.1039/d4cp04117h), 2025-01-01
Supplement: d4cp04117h1.pdf [file d4cp04117h1.pdf]

**Supplementary Information for**  
**H<sub>2</sub>O as a catalyst on the reaction of HONO and**  
**Criegee intermediate (CH<sub>2</sub>OO)**

Vishva Jeet Anand, Vivek Kumar, Amit Kumar, and Pradeep Kumar\*

*Department of Chemistry, Malaviya National Institute of Technology Jaipur, Jaipur,  
302017, India*

E-mail: pradeep.chy@mnit.ac.in

**Sl. No.****Contents**

- 1 Formal proof for same value of termolecular rate constant for path A, B and C.
- 2 **Table S1:** Optimized geometries in Cartesian coordinates and all normal mode frequencies calculated at the M062X/aug-cc-pVTZ level of theory.
- 3 **Figure S1:** Arrhenius plot for SHAT-WM channel of the bimolecular rate constants ( $k_b$ ) for the  $\text{CH}_2\text{OO} + \text{cis/trans-HONO}$  reaction in presence of  $\text{H}_2\text{O}$  within the temperature range of 213 K to 320 K for the A(P1), path B(P2) and path C(P3)
- 4 **Figure S2:** Arrhenius plot for DHAT-WM channel of the bimolecular rate constants ( $k_b$ ) for the  $\text{CH}_2\text{OO} + \text{cis/trans-HONO}$  reaction in presence of  $\text{H}_2\text{O}$  within the temperature range of 213 K to 320 K for the path A(P1), path B(P2) and path C(P3)
- 5 **Figure S3:** Gibbs free energy profile for  $\text{CH}_2\text{OO} + \text{cis-HONO}$  reaction in presence of  $\text{H}_2\text{O}$  and  $(\text{H}_2\text{O})_2$  calculated at CCSD(T)/CBS//M06-2X/aug-cc-pVTZ level of theory.
- 6 **Figure S4:** Gibbs free energy profile for  $\text{CH}_2\text{OO} + \text{trans-HONO}$  reaction in presence of  $\text{H}_2\text{O}$  and  $(\text{H}_2\text{O})_2$  calculated at CCSD(T)/CBS//M06-2X/aug-cc-pVTZ level of theory.
- 7 **Figure S5:** Potential free energy surface for  $\text{CH}_2\text{OO} + \text{H}_2\text{O}$  uncatalysed and HONO-catalyzed reaction calculated at CCSD(T)/CBS//M06-2X/aug-cc-pVTZ level of theory.
- 8 **Table S2:** Termolecular rate constant  $k_t$  in ( $\text{cm}^6 \text{ molecule}^{-2} \text{ sec}^{-1}$ ) for  $\text{H}_2\text{O}$  catalyzed channels for OAT path for  $\text{CH}_2\text{OO} + \text{cis-HONO}$  within temperature range 213-320K.
- 9 **Table S3:** Termolecular rate constant  $k_t$  in ( $\text{cm}^6 \text{ molecule}^{-2} \text{ sec}^{-1}$ ) for  $\text{H}_2\text{O}$  catalyzed channels for OAT path for  $\text{CH}_2\text{OO} + \text{trans-HONO}$  within temperature range 213-320K.
- 10 **Table S4:** Termolecular rate constant  $k_t$  in ( $\text{cm}^6 \text{ molecule}^{-2} \text{ sec}^{-1}$ ) for  $(\text{H}_2\text{O})_2$  catalyzed channels for OAT path for  $\text{CH}_2\text{OO} + \text{cis-HONO}$  within temperature range 213-320K.
- 11 **Table S5:** Termolecular rate constant  $k_t$  in ( $\text{cm}^6 \text{ molecule}^{-2} \text{ sec}^{-1}$ ) for  $(\text{H}_2\text{O})_2$  catalyzed channels for OAT path for  $\text{CH}_2\text{OO} + \text{trans-HONO}$  within temperature range 213-320K.

12. **Table S6:** Bimolecular rate constant  $k_b$  in ( $\text{cm}^3 \text{ molecule}^{-1} \text{ sec}^{-1}$ ) for  $\text{H}_2\text{O}$  catalyzed channels for OAT path for  $\text{CH}_2\text{OO} + \text{cis/trans-HONO}$  within temperature range 213-320K.
13. **Table S7:** Bimolecular rate constant  $k_b$  in ( $\text{cm}^3 \text{ molecule}^{-1} \text{ sec}^{-1}$ ) for  $(\text{H}_2\text{O})_2$  catalyzed channels for OAT path for  $\text{CH}_2\text{OO} + \text{cis/trans-HONO}$  within temperature range 213-320K.
14. **Table S8:** Termolecular rate constant  $k_t$  in ( $\text{cm}^6 \text{ molecule}^{-2} \text{ sec}^{-1}$ ) for  $\text{H}_2\text{O}$  catalyzed channels for SHAT-WM for  $\text{CH}_2\text{OO} + \text{cis-HONO}$  within temperature range 213-320K.
15. **Table S9:** Termolecular rate constant  $k_t$  in ( $\text{cm}^6 \text{ molecule}^{-2} \text{ sec}^{-1}$ ) for  $\text{H}_2\text{O}$  catalyzed channels for SHAT-WM for  $\text{CH}_2\text{OO} + \text{trans-HONO}$  within temperature range 213-320K.
16. **Table S10:** Termolecular rate constant  $k_t$  in ( $\text{cm}^6 \text{ molecule}^{-2} \text{ sec}^{-1}$ ) for  $\text{H}_2\text{O}$  catalyzed channels for DHAT-WM for  $\text{CH}_2\text{OO} + \text{cis-HONO}$  within temperature range 213-320K.
17. **Table S11:** Termolecular rate constant  $k_t$  in ( $\text{cm}^6 \text{ molecule}^{-2} \text{ sec}^{-1}$ ) for  $\text{H}_2\text{O}$  catalyzed channels for DHAT-WM for  $\text{CH}_2\text{OO} + \text{trans-HONO}$  within temperature range 213-320K.
18. **Table S12:** Bimolecular rate constant  $k_b$  in ( $\text{cm}^3 \text{ molecule}^{-1} \text{ sec}^{-1}$ ) for  $\text{H}_2\text{O}$  catalyzed channels for SHAT-WM path for  $\text{CH}_2\text{OO} + \text{cis/trans-HONO}$  within temperature range 213-320K.
19. **Table S13:** Bimolecular rate constant  $k_b$  in ( $\text{cm}^3 \text{ molecule}^{-1} \text{ sec}^{-1}$ ) for  $\text{H}_2\text{O}$  catalyzed channels for DHAT-WM path for  $\text{CH}_2\text{OO} + \text{cis/trans-HONO}$  within temperature range 213-320K.
20. **Table S14:** Termolecular rate constant  $k_t$  in ( $\text{cm}^6 \text{ molecule}^{-2} \text{ sec}^{-1}$ ) for  $(\text{H}_2\text{O})_2$  catalyzed channels for SHAT-WD for  $\text{CH}_2\text{OO} + \text{cis-HONO}$  within temperature range 213-320K.
21. **Table S15:** Termolecular rate constant  $k_t$  in ( $\text{cm}^6 \text{ molecule}^{-2} \text{ sec}^{-1}$ ) for  $(\text{H}_2\text{O})_2$  catalyzed channels for SHAT-WD for  $\text{CH}_2\text{OO} + \text{trans-HONO}$  within temperature range 213-320K.
22. **Table S16:** Termolecular rate constant  $k_t$  in ( $\text{cm}^6 \text{ molecule}^{-2} \text{ sec}^{-1}$ ) for  $(\text{H}_2\text{O})_2$  catalyzed channels for THAT-WD for  $\text{CH}_2\text{OO} + \text{cis-HONO}$  within temperature range 213-320K.
23. **Table S17:** Termolecular rate constant  $k_t$  in ( $\text{cm}^6 \text{ molecule}^{-2} \text{ sec}^{-1}$ ) for  $(\text{H}_2\text{O})_2$  catalyzed channels for THAT-WD for  $\text{CH}_2\text{OO} + \text{trans-HONO}$  within temperature range 213-320K.
24. **Table S18:** Bimolecular rate constant  $k_b$  in ( $\text{cm}^3 \text{ molecule}^{-1} \text{ sec}^{-1}$ ) for  $(\text{H}_2\text{O})_2$  catalyzed channels for SHAT-WD path for  $\text{CH}_2\text{OO} + \text{cis/trans-HONO}$  within temperature range 213-320K.
25. **Table S19:** Bimolecular rate constant  $k_b$  in ( $\text{cm}^3 \text{ molecule}^{-1} \text{ sec}^{-1}$ ) for  $(\text{H}_2\text{O})_2$  catalyzed channels for THAT-WD path for  $\text{CH}_2\text{OO} + \text{cis/trans-HONO}$  within temperature range 213-320K.

26. **Table S20:**Concentration of  $\text{H}_2\text{O}$  and  $(\text{H}_2\text{O})_2$  at 20% RH and 100% RH with in temperature range of 280-320 K.
27. **Table S21:**Bimolecular rate constant  $k_{bi}$  (in  $\text{cm}^3 \text{ molecule}^{-1} \text{ s}^{-1}$  ) for uncatalyzed reaction of  $\text{CH}_2\text{OO} + \text{H}_2\text{O}$  within the temperature range 213–320 K.
28. **Table S21:**Bimolecular rate constant  $k_b$  in ( $\text{cm}^3 \text{ molecule}^{-1} \text{ sec}^{-1}$ ) for reaction  $\text{CH}_2\text{OO} + \text{H}_2\text{O}$  catalyzed by HONO within temperature range 213-320K
29. **Table S23:**Bimolecular rate constant  $k_b$  in ( $\text{cm}^3 \text{ molecule}^{-1} \text{ sec}^{-1}$ ) for  $\text{CH}_2\text{OO} + \text{H}_2\text{O}$  uncatalyzed reaction and  $k_{eff}$  for HONO catalyzed reaction in temperature range 280-320K.

# 1 Formal proof for same value of termolecular rate constant for path A, B and C

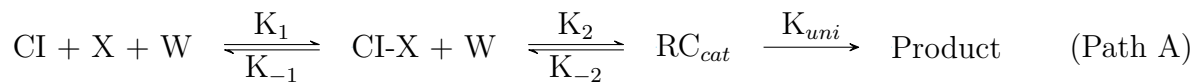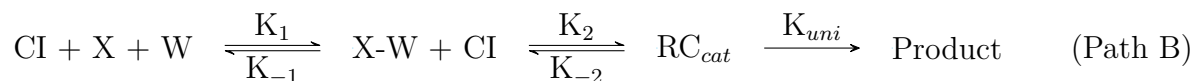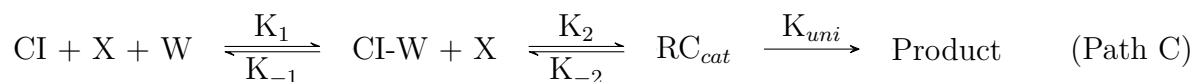

Where CI = CH<sub>2</sub>OO; X = cis-HONO and trans-HONO; W = WM and WD (WM = H<sub>2</sub>O and WD = (H<sub>2</sub>O)<sub>2</sub>).

For path A,

$$K_{eq1} = \frac{[CI - X]}{[CI][X]} \quad (\text{E1})$$

and

$$K_{eq2} = \frac{[RC_{cat}]}{[CI - X][W]} \quad (\text{E2})$$

Therefore,

$$K_{eq1} \times K_{eq2} = \frac{[RC_{cat}]}{[CI][X][W]} \quad (\text{E3})$$

Similarly, for path B,

$$K_{eq1} \times K_{eq2} = \frac{[X - W]}{[X][W]} \times \frac{[RC_{cat}]}{[X - W][CI]} \quad (\text{E4})$$

$$K_{eq1} \times K_{eq2} = \frac{[RC_{cat}]}{[CI][X][W]} \quad (\text{E5})$$

and similarly, for path C,

$$K_{eq1} \times K_{eq2} = \frac{[CI - W]}{[CI][W]} \times \frac{[RC_{cat}]}{[CI - W][X]} \quad (\text{E6})$$

$$K_{eq1} \times K_{eq2} = \frac{[RC_{cat}]}{[CI][X][W]} \quad (\text{E7})$$

From the equation 3, 5 and 7, it is clear that, the product of  $K_{eq1}$  and  $K_{eq2}$  is same for path A, B and C. As the  $k_{uni}$  for path A, B and C are also same, it gives same trimolecular rate  $k_t$ .

Table S1: Optimized geometries in Cartesian coordinates and normal mode frequencies of all species calculate at M062X/aug-cc-pVTZ level of theory

| compound                        | cartesian coordinate(Å) |           |           | frequency(cm <sup>-1</sup> ) |           |           |           |
|---------------------------------|-------------------------|-----------|-----------|------------------------------|-----------|-----------|-----------|
| CH <sub>2</sub> OO              | C                       | 1.057098  | -0.186173 | -0.000000                    | 538.3305  | 697.7172  | 927.1975  |
|                                 | H                       | 1.006168  | -1.269153 | -0.000000                    | 1023.9710 | 1260.6781 | 1433.3721 |
|                                 | H                       | 1.966689  | 0.398410  | -0.000000                    | 1630.8902 | 3139.9739 | 3290.5878 |
|                                 | O                       | 0.000000  | 0.459688  | 0.000000                     |           |           |           |
|                                 | H                       | -1.164430 | -0.211215 | 0.000000                     |           |           |           |
| cis-HONO                        | N                       | -0.160495 | -0.516031 | 0.000006                     | 686.7057  | 703.2170  | 970.3635  |
|                                 | O                       | 1.070217  | 0.068858  | -0.000006                    | 1372.6581 | 1782.9429 | 3661.8225 |
|                                 | O                       | -1.044659 | 0.253523  | -0.000003                    |           |           |           |
|                                 | H                       | 0.918996  | 1.033168  | 0.000032                     |           |           |           |
| trans-HONO                      | N                       | 0.000000  | 0.507841  | -0.000000                    | 578.2458  | 700.4215  | 905.0454  |
|                                 | O                       | -0.882552 | -0.567176 | 0.000000                     | 1342.3941 | 1841.1078 | 3830.8277 |
|                                 | O                       | 1.101711  | 0.141484  | -0.000000                    |           |           |           |
|                                 | H                       | -1.753278 | -0.149344 | 0.000000                     |           |           |           |
| H <sub>2</sub> O                | O                       | -0.000000 | 0.000000  | 0.116403                     | 1619.8119 | 3868.0740 | 3971.0249 |
|                                 | H                       | 0.000000  | 0.762572  | -0.465611                    |           |           |           |
|                                 | H                       | -0.000000 | -0.762572 | -0.465611                    |           |           |           |
| (H <sub>2</sub> O) <sub>2</sub> | O                       | -1.504794 | -0.029013 | -0.117920                    | 89.9842   | 131.5322  | 141.9149  |
|                                 | O                       | 1.386463  | 0.023055  | 0.109603                     | 192.2343  | 358.2648  | 611.0779  |
|                                 | H                       | -1.937073 | 0.180728  | 0.711300                     | 1617.8761 | 1636.3988 | 3772.6920 |
|                                 | H                       | -0.556922 | 0.014790  | 0.064386                     | 3859.6043 | 3943.7152 | 3958.8311 |
|                                 | H                       | 1.725451  | 0.676007  | -0.507602                    |           |           |           |
|                                 | H                       | 1.715190  | -0.823861 | -0.201556                    |           |           |           |
| Cl-cis-HONO                     | O                       | 1.036586  | -1.124895 | 0.385188                     | 25.2157   | 97.1134   | 104.0131  |
|                                 | O                       | 1.869973  | -0.366333 | -0.390309                    | 170.0995  | 200.9472  | 263.5589  |
|                                 | C                       | 2.060976  | 0.805543  | -0.050328                    | 543.2241  | 697.1947  | 740.8312  |
|                                 | H                       | 2.711031  | 1.380007  | -0.698415                    | 890.9788  | 1001.2501 | 1024.3023 |
|                                 | H                       | 1.584970  | 1.187365  | 0.846651                     | 1090.1125 | 1266.0754 | 1450.4279 |
|                                 | N                       | -2.074269 | 0.522948  | -0.094524                    | 1462.5484 | 1462.5484 | 1462.5484 |
|                                 | O                       | -0.793575 | 0.738315  | 0.298145                     | 2987.4652 | 3134.7497 | 3281.7521 |
|                                 | O                       | -2.342006 | -0.611644 | -0.237751                    |           |           |           |
|                                 | H                       | -0.309796 | -0.144823 | 0.373216                     |           |           |           |
| Cl-trans-HONO                   | C                       | 1.422724  | 1.180300  | 0.176264                     | 65.1207   | 91.9279   | 142.0697  |
|                                 | H                       | 1.037130  | 1.113235  | 1.186682                     | 165.9408  | 223.8118  | 272.202   |
|                                 | H                       | 1.580393  | 2.105828  | -0.364836                    | 525.7623  | 695.332   | 769.4194  |
|                                 | O                       | 1.727404  | 0.147988  | -0.424232                    | 877.0022  | 1008.9022 | 1051.5794 |
|                                 | O                       | 1.498260  | -1.038558 | 0.245641                     | 1106.9792 | 1256.5074 | 1448.4889 |
|                                 | N                       | -1.275346 | 0.258295  | 0.073862                     | 1556.3251 | 1678.5345 | 1793.8428 |
|                                 | O                       | -1.092608 | -1.060602 | -0.093796                    | 2996.4334 | 3141.5958 | 3286.1768 |
|                                 | O                       | -2.398526 | 0.585849  | -0.031398                    |           |           |           |
|                                 | H                       | -0.102689 | -1.186339 | 0.033818                     |           |           |           |

| compound      | Cartesian coordinate(Å) |           |           | frequency( $\text{cm}^{-1}$ ) |           |           |           |
|---------------|-------------------------|-----------|-----------|-------------------------------|-----------|-----------|-----------|
| cis-HONO-WM   | N                       | 1.358448  | 0.015234  | 0.015823                      | 120.5489  | 146.5676  | 183.9852  |
|               | O                       | 0.585475  | -1.079869 | 0.000804                      | 200.4508  | 268.5492  | 405.7981  |
|               | O                       | 0.759884  | 1.035792  | 0.000334                      | 748.907   | 884.0683  | 1061.2885 |
|               | H                       | -0.362567 | -0.793271 | -0.016583                     | 1473.5526 | 1601.8332 | 1740.6843 |
|               | O                       | -1.947164 | 0.021736  | -0.076506                     | 3364.8022 | 3834.7358 | 3947.5767 |
|               | H                       | -2.726330 | -0.050812 | 0.479297                      |           |           |           |
|               | H                       | -1.605810 | 0.916166  | 0.029466                      |           |           |           |
| cis-HONO-WD   | N                       | 1.736325  | 0.585748  | 0.018625                      | 34.5621   | 100.4578  | 125.6849  |
|               | O                       | 1.603113  | -0.728368 | -0.033893                     | 167.5002  | 181.7461  | 210.4327  |
|               | O                       | 0.711635  | 1.190239  | 0.035121                      | 220.4845  | 268.7695  | 317.4002  |
|               | H                       | 0.629782  | -0.98796  | -0.039639                     | 401.7705  | 463.725   | 704.8529  |
|               | O                       | -2.155682 | 0.819729  | -0.074453                     | 777.0812  | 1009.4344 | 1125.3684 |
|               | H                       | -1.282722 | 1.226202  | -0.009713                     | 1494.0458 | 1606.2442 | 1639.6406 |
|               | H                       | -2.779708 | 1.409241  | 0.351756                      | 1709.0784 | 3041.7907 | 3627.0145 |
|               | O                       | -0.908281 | -1.605882 | -0.053815                     | 3811.7069 | 3927.3651 | 3951.1711 |
|               | H                       | -1.164712 | -2.267241 | 0.591744                      |           |           |           |
| H             | -1.563187               | -0.886222 | -0.008207 |                               |           |           |           |
| trans-HONO-WM | N                       | -1.256053 | -0.133790 | -0.313482                     | 21.0411   | 42.2116   | 127.7496  |
|               | O                       | -0.648233 | 1.016990  | 0.199513                      | 138.2001  | 169.0799  | 353.9045  |
|               | O                       | -0.789070 | -1.085823 | 0.155247                      | 571.9561  | 697.8119  | 880.9137  |
|               | H                       | -1.080641 | 1.743291  | -0.268761                     | 1331.3135 | 1627.9115 | 1843.7424 |
|               | O                       | 2.222275  | 0.021601  | -0.102957                     | 3826.1442 | 3855.9378 | 3952.8957 |
|               | H                       | 2.160866  | -0.881929 | 0.213642                      |           |           |           |
|               | H                       | 1.432375  | 0.453020  | 0.23507                       |           |           |           |
| trans-HONO-WD | N                       | -1.724475 | 0.41749   | 0.151690                      | 16.9262   | 75.3704   | 123.797   |
|               | O                       | -0.540401 | -0.045714 | -0.364193                     | 135.2253  | 165.6112  | 206.4476  |
|               | O                       | -2.560771 | -0.395289 | 0.105131                      | 224.6619  | 254.4071  | 274.9122  |
|               | H                       | 0.109382  | 0.690513  | -0.252989                     | 388.2484  | 466.1589  | 679.7725  |
|               | O                       | 1.986142  | -1.320842 | 0.158616                      | 765.5282  | 921.7129  | 959.2054  |
|               | H                       | 1.040303  | -1.412495 | -0.013370                     | 1466.0205 | 1616.4012 | 1627.0178 |
|               | H                       | 2.423583  | -1.991983 | -0.369103                     | 1817.1194 | 3364.0387 | 3681.1198 |
|               | O                       | 1.674682  | 1.418585  | -0.050458                     | 3801.8519 | 3930.7305 | 3939.8068 |
|               | H                       | 1.900817  | 1.972963  | 0.698921                      |           |           |           |
| H             | 2.120016                | 0.564653  | 0.081933  |                               |           |           |           |
| Cl-WM         | C                       | -0.797098 | 1.017621  | -0.169000                     | 110.0571  | 171.179   | 222.4623  |
|               | H                       | -1.289634 | 1.87323   | 0.275769                      | 227.2284  | 435.6982  | 535.1828  |
|               | O                       | -1.087843 | -0.076611 | 0.324367                      | 683.1774  | 714.8774  | 895.9509  |
|               | O                       | -0.473713 | -1.185961 | -0.185845                     | 1080.1801 | 1270.1252 | 1455.4179 |
|               | H                       | -0.087827 | 1.067076  | -0.986932                     | 1640.7768 | 1662.8201 | 3140.7315 |
|               | O                       | 1.853688  | 0.211666  | 0.016441                      | 3286.5306 | 3550.577  | 3936.821  |
|               | H                       | 2.591074  | -0.10064  | 0.542576                      |           |           |           |
| H             | 1.231917                | -0.538143 | -0.057126 |                               |           |           |           |



| compound                                 | Cartesian coordinate(Å) |           |           | frequency(cm <sup>-1</sup> ) |           |           |           |
|------------------------------------------|-------------------------|-----------|-----------|------------------------------|-----------|-----------|-----------|
| CI-WD                                    | C                       | -0.99447  | 1.135818  | 0.159284                     | 41.789    | 97.4814   | 160.6923  |
|                                          | H                       | -0.794513 | 1.072527  | 1.22165                      | 216.6512  | 230.8245  | 270.7968  |
|                                          | H                       | -1.009016 | 2.057106  | -0.406697                    | 286.7935  | 293.3305  | 449.2186  |
|                                          | O                       | -1.281167 | 0.109426  | -0.459071                    | 478.0156  | 525.5965  | 720.3481  |
|                                          | O                       | -1.252019 | -1.073791 | 0.279876                     | 834.7527  | 863.5392  | 971.9557  |
|                                          | O                       | 1.361202  | -1.392561 | 0.023324                     | 1110.8924 | 1255.4107 | 1448.0697 |
|                                          | H                       | 0.3756    | -1.432483 | 0.136507                     | 1632.9744 | 1661.7515 | 1686.0854 |
|                                          | H                       | 1.574245  | -1.979577 | -0.703903                    | 3156.6415 | 3185.1121 | 3299.6805 |
|                                          | O                       | 1.437603  | 1.295324  | -0.050003                    | 3411.8486 | 3920.9437 | 3928.6186 |
|                                          | H                       | 1.567026  | 0.320167  | -0.07523                     |           |           |           |
| H                                        | 2.128521                | 1.640172  | 0.518954  |                              |           |           |           |
| RC <sub>unc</sub>                        | O                       | 1.432993  | -1.144409 | 0.153765                     | 29.3392   | 89.2185   | 105.997   |
|                                          | O                       | 1.983689  | -0.052822 | -0.463434                    | 156.3452  | 166.5127  | 258.9553  |
|                                          | C                       | 1.875536  | 1.03995   | 0.100942                     | 539.422   | 694.0269  | 764.4053  |
|                                          | H                       | 2.309294  | 1.881652  | -0.424708                    | 888.5999  | 964.2469  | 1041.582  |
|                                          | H                       | 1.369229  | 1.102514  | 1.05852                      | 1090.8326 | 1266.752  | 1439.2134 |
|                                          | N                       | -1.880012 | -0.369376 | -0.242632                    | 1459.304  | 1664.7057 | 1806.2324 |
|                                          | O                       | -0.830421 | 0.084835  | 0.506977                     | 3091.3709 | 3135.9082 | 3281.578  |
|                                          | H                       | -0.095611 | -0.583808 | 0.382315                     |           |           |           |
| O                                        | -2.795766               | 0.355592  | -0.187728 |                              |           |           |           |
| RC <sub>cis-HONO-WM</sub> <sup>HAT</sup> | C                       | -0.496156 | -0.580363 | -1.055982                    | 51.6324   | 72.8583   | 92.9749   |
|                                          | H                       | -0.548275 | -1.004732 | -2.053277                    | 107.7352  | 114.0658  | 188.3751  |
|                                          | O                       | -0.951279 | -1.335447 | -0.164885                    | 192.9571  | 207.6148  | 241.3837  |
|                                          | O                       | -0.652712 | -0.829547 | 1.114353                     | 285.2275  | 351.2689  | 533.7014  |
|                                          | N                       | 2.121972  | 0.454435  | -0.110746                    | 569.0157  | 705.8774  | 758.5568  |
|                                          | O                       | 1.561918  | -0.70351  | 0.033777                     | 880.6592  | 1021.0363 | 1058.5222 |
|                                          | O                       | 1.396576  | 1.393962  | 0.119025                     | 1140.266  | 1288.9835 | 1471.2737 |
|                                          | H                       | 0.387054  | -0.678658 | 0.911968                     | 1509.9675 | 1623.6103 | 1664.2566 |
|                                          | H                       | -0.211911 | 0.441285  | -0.839497                    | 1737.3376 | 2910.8582 | 3093.8136 |
|                                          | O                       | -2.265374 | 1.265855  | -0.061307                    | 3254.9123 | 3753.4707 | 3923.6978 |
|                                          | H                       | -1.917506 | 0.988181  | 0.793593                     |           |           |           |
|                                          | H                       | -2.299257 | 2.224559  | -0.029376                    |           |           |           |
| RC <sub>cis-HONO-WD</sub> <sup>HAT</sup> | C                       | 1.190899  | -0.893387 | 1.183517                     | 26.3112   | 41.3534   | 71.4733   |
|                                          | H                       | 1.670417  | -1.330379 | 2.053322                     | 83.4998   | 106.9915  | 120.7699  |
|                                          | O                       | 1.281338  | -1.57845  | 0.158903                     | 174.0614  | 193.5053  | 214.2513  |
|                                          | O                       | 0.680724  | -1.065946 | -0.985395                    | 219.1437  | 226.9471  | 240.3952  |
|                                          | N                       | -2.448542 | -0.019613 | 0.082268                     | 286.6656  | 305.7332  | 377.7149  |
|                                          | O                       | -1.666834 | -1.102298 | 0.161408                     | 425.7893  | 547.722   | 658.6053  |
|                                          | O                       | -2.079513 | 0.786361  | -0.701802                    | 742.9256  | 746.1856  | 756.8695  |
|                                          | H                       | -0.876796 | -1.000677 | -0.463765                    | 885.1324  | 1043.2498 | 1070.7831 |
|                                          | H                       | 0.668987  | 0.069523  | 1.175168                     | 1191.7722 | 1277.5024 | 1469.6176 |
|                                          | O                       | 0.132581  | 1.964017  | 1.001246                     | 1480.4018 | 1614.0888 | 1644.2493 |

|                            |   |           |           |           |           |            |           |
|----------------------------|---|-----------|-----------|-----------|-----------|------------|-----------|
|                            | H | -0.699284 | 2.162489  | 0.562884  | 1672.4784 | 1721.4743  | 2940.8839 |
|                            | H | 0.814401  | 2.043082  | 0.315956  | 3026.6831 | 3231.4937  | 3539.8102 |
|                            | O | 2.148166  | 1.20147   | -0.736724 | 3718.8733 | 3903.969   | 3933.7787 |
|                            | H | 1.64246   | 0.454852  | -1.112992 |           |            |           |
|                            | H | 2.802515  | 1.457484  | -1.388631 |           |            |           |
| $RC_{trans-HONO-WM}^{HAT}$ | C | 0.362467  | 0.682448  | 0.901057  | 42.1718   | 64.1998    | 87.502    |
|                            | H | 0.608937  | 1.222162  | 1.812028  | 128.7622  | 133.6321   | 154.2084  |
|                            | O | -0.28366  | 1.626058  | 0.10215   | 183.6659  | 193.2102   | 255.7933  |
|                            | O | -0.760474 | 0.951695  | -1.055413 | 307.941   | 379.8174   | 530.3174  |
|                            | N | 1.660508  | -0.954337 | -0.331051 | 590.8488  | 695.5904   | 769.0961  |
|                            | O | 1.592814  | 0.290598  | 0.315982  | 880.8467  | 998.875    | 1045.5866 |
|                            | H | -0.199422 | 1.324194  | -1.746971 | 1130.1232 | 1261.4086  | 1461.8893 |
|                            | H | -0.278823 | -0.17499  | 1.089517  | 1555.3241 | 1619.375   | 1688.3073 |
|                            | O | -2.441331 | -0.97242  | 0.420295  | 1798.4696 | 3039.2332  | 3149.6617 |
|                            | H | -2.134381 | -1.829903 | 0.11741   | 3294.988  | 3692.3941  | 3940.3336 |
|                            | H | -2.186664 | -0.35979  | -0.277841 |           |            |           |
|                            | O | 0.691651  | -1.59543  | -0.293405 |           |            |           |
| $RC_{trans-HONO-WD}^{HAT}$ | C | 2.243979  | 2.497913  | 0.63895   | 33.3424   | 59.3733    | 66.2554   |
|                            | H | 1.450344  | 3.040729  | 1.141717  | 84.0959   | 110.7622   | 139.3783  |
|                            | H | 3.304371  | 2.653102  | 0.791431  | 150.3927  | 183.4357   | 206.2628  |
|                            | O | 1.945819  | 1.621944  | -0.177256 | 229.728   | 252.0782   | 285.7093  |
|                            | O | 0.629067  | 1.389727  | -0.40372  | 321.0801  | 363.1218   | 407.2697  |
|                            | N | -2.633162 | 0.282129  | 0.578774  | 489.0763  | 529.1405   | 747.4006  |
|                            | O | -2.042744 | 0.475859  | -0.658399 | 771.5146  | 790.9336   | 886.056   |
|                            | O | -3.545941 | -0.469793 | 0.516914  | 921.9016  | 1028.2688  | 1054.1251 |
|                            | H | -1.307648 | 1.081488  | -0.476277 | 1130.7963 | 1253.3169  | 1451.2502 |
|                            | O | 0.548696  | -1.416704 | -0.738471 | 1564.1764 | 1622.6956  | 1647.3297 |
|                            | H | 0.591932  | -0.449616 | -0.675635 | 1673.6545 | 1793.2738  | 2979.2209 |
|                            | H | -0.162121 | -1.600146 | -1.355917 | 3175.0568 | 3316.6346  | 3358.8869 |
|                            | O | 2.190613  | -3.438472 | 0.477544  | 3467.1017 | 3912.4755  | 3929.4294 |
|                            | H | 1.633121  | -2.756267 | 0.075343  |           |            |           |
|                            | H | 1.654181  | -4.232157 | 0.481337  |           |            |           |
| $RC_{cis-HONO-WM}^{OAT}$   | O | 0.431715  | 1.431715  | 0.657574  | 33.2158   | 64.7771    | 76.2672   |
|                            | O | 1.165336  | -0.985989 | -0.480483 | 136.4359  | 153.7481   | 175.9441  |
|                            | C | 2.229679  | -0.407902 | -0.253004 | 202.5597  | 241.6534   | 294.3435  |
|                            | H | 2.809728  | -0.124568 | -1.121934 | 299.9111  | 378.3229   | 552.2047  |
|                            | H | 2.551144  | -0.267423 | 0.770841  | 611.7938  | 731.6896   | 781.5566  |
|                            | N | -2.296195 | 0.342606  | -0.206818 | 892.3795  | 1128.5001  | 1177.3488 |
|                            | O | -1.974175 | -0.909214 | -0.018647 | 1242.6279 | 1262.1418  | 1450.648  |
|                            | O | -1.40379  | 1.128248  | -0.057819 | 1502.7628 | 1633.4903  | 1649.7576 |
|                            | O | 1.351068  | 1.758128  | 0.263187  | 1693.1381 | 2399.1767  | 3156.045  |
|                            | H | 0.427399  | 1.466004  | 0.335217  | 3299.1806 | 3704.63587 | 3920.4664 |
|                            | H | -0.968529 | -1.022903 | 0.249986  |           |            |           |
|                            | H | 1.314318  | 2.609424  | -0.178856 |           |            |           |

| compound                                   | Cartesian coordinate(Å) |           |           | frequency(cm <sup>-1</sup> ) |           |           |           |
|--------------------------------------------|-------------------------|-----------|-----------|------------------------------|-----------|-----------|-----------|
| RC <sup>OAT</sup> <sub>cis-HONO-WD</sub>   | O                       | 0.066104  | -0.888321 | 0.946375                     | 32.2996   | 43.4628   | 59.4677   |
|                                            | O                       | 0.631311  | -1.11846  | -0.322491                    | 80.6005   | 113.97    | 134.3993  |
|                                            | C                       | 1.841891  | -1.369491 | -0.303291                    | 138.7453  | 222.8683  | 241.5706  |
|                                            | H                       | 2.29825   | -1.573172 | -1.261593                    | 251.914   | 267.8315  | 287.8588  |
|                                            | H                       | 2.336496  | -1.505773 | 0.649308                     | 336.2342  | 364.0409  | 427.8116  |
|                                            | N                       | -2.773672 | 0.246616  | -0.43938                     | 535.4577  | 555.358   | 751.8357  |
|                                            | O                       | -2.445508 | -0.838529 | 0.244882                     | 765.5615  | 792.4757  | 885.8985  |
|                                            | O                       | -1.89017  | 1.031212  | -0.578035                    | 989.0751  | 1116.4449 | 1129.9667 |
|                                            | O                       | 0.700608  | 1.796104  | 0.640358                     | 1159.6876 | 1254.8401 | 1449.1414 |
|                                            | H                       | 0.324838  | 0.941666  | 0.928019                     | 1489.3516 | 1633.1545 | 1654.8092 |
|                                            | H                       | 0.014895  | 2.171275  | 0.079831                     | 1679.5465 | 1705.1037 | 2776.1897 |
|                                            | O                       | 2.831427  | 0.656514  | -0.429383                    | 3166.4398 | 3222.4261 | 3308.6157 |
|                                            | H                       | 3.617938  | 0.935533  | 0.045643                     | 3580.5329 | 3892.9875 | 3906.1749 |
|                                            | H                       | 2.085592  | 1.213501  | -0.0857                      |           |           |           |
| H                                          | -1.463817               | -0.800551 | 0.526246  |                              |           |           |           |
| RC <sup>OAT</sup> <sub>trans-HONO-WM</sub> | O                       | -2.431613 | -0.083413 | 0.080006                     | 19.5347   | 27.9408   | 83.5884   |
|                                            | O                       | -1.548534 | -0.989039 | -0.493349                    | 105.4524  | 144.8179  | 156.9422  |
|                                            | C                       | -0.753515 | -1.531925 | 0.275666                     | 219.3817  | 262.5549  | 290.5811  |
|                                            | H                       | -0.049034 | -2.223683 | -0.170344                    | 301.4177  | 521.8913  | 558.6657  |
|                                            | H                       | -0.807015 | -1.313322 | 1.335726                     | 721.1643  | 773.7072  | 824.7754  |
|                                            | N                       | 2.151023  | 0.382839  | -0.248067                    | 872.3713  | 972.9461  | 1113.0119 |
|                                            | O                       | 1.018198  | 0.282675  | 0.502216                     | 1120.4312 | 1250.6285 | 1446.3102 |
|                                            | O                       | 2.819061  | -0.574563 | -0.150046                    | 1469.24   | 1668.5734 | 1683.6944 |
|                                            | H                       | 0.442362  | 1.081191  | 0.277244                     | 1794.1749 | 2934.5576 | 3143.8775 |
|                                            | O                       | -0.796806 | 1.974774  | -0.140699                    | 3182.4481 | 3287.4663 | 3928.8452 |
|                                            | H                       | -1.544732 | 1.320333  | -0.081264                    |           |           |           |
|                                            | H                       | -1.060103 | 2.763682  | 0.336087                     |           |           |           |
| RC <sup>OAT</sup> <sub>trans-HONO-WD</sub> | O                       | -1.831801 | -1.363888 | -0.615627                    | 25.6065   | 60.0305   | 68.0513   |
|                                            | O                       | -2.414468 | -0.096203 | -0.729797                    | 74.6629   | 100.4945  | 113.1461  |
|                                            | C                       | -1.646435 | 0.819952  | -1.037555                    | 142.1348  | 170.7908  | 188.5482  |
|                                            | H                       | -2.094861 | 1.79824   | -1.14419                     | 245.3723  | 273.9449  | 302.892   |
|                                            | H                       | -0.604945 | 0.597343  | -1.247679                    | 353.4464  | 374.4019  | 447.1659  |
|                                            | N                       | 2.658323  | -0.485    | -0.126231                    | 523.5883  | 583.0445  | 686.8457  |
|                                            | O                       | 1.478164  | 0.181578  | 0.087801                     | 752.2933  | 766.4865  | 877.1865  |
|                                            | O                       | 3.388281  | 0.136592  | -0.792466                    | 931.5643  | 957.3322  | 1084.9106 |
|                                            | H                       | 0.923282  | -0.420984 | 0.650165                     | 1135.1621 | 1259.8456 | 1453.884  |
|                                            | O                       | -0.422615 | -1.014717 | 1.463955                     | 1464.2929 | 1645.5445 | 1674.758  |
|                                            | H                       | -1.030051 | -1.263449 | 0.681946                     | 1680.4659 | 1815.176  | 2710.8746 |
|                                            | H                       | -0.45052  | -1.725308 | 2.106946                     | 3142.5115 | 3255.3668 | 3290.9893 |
|                                            | O                       | -0.79918  | 1.73819   | 1.039259                     | 3712.4853 | 3874.6265 | 3925.4635 |
|                                            | H                       | 0.134243  | 1.942714  | 0.917658                     |           |           |           |
|                                            | H                       | -0.793855 | 0.894325  | 1.519101                     |           |           |           |

| compound                                   | Cartesian coordinate(Å)                  |           |           | frequency(cm <sup>-1</sup> ) |           |           |           |
|--------------------------------------------|------------------------------------------|-----------|-----------|------------------------------|-----------|-----------|-----------|
| TS <sup>OAT</sup> <sub>cis-HONO-WM</sub>   | O                                        | 0.205758  | -0.604827 | -0.150844                    | -662.7351 | 24.9058   | 56.1177   |
|                                            | O                                        | 1.81586   | -0.979435 | -0.571166                    | 67.9441   | 113.06    | 160.8101  |
|                                            | C                                        | 2.56958   | -0.615361 | 0.300471                     | 178.9455  | 185.8344  | 235.4462  |
|                                            | H                                        | 3.646149  | -0.745851 | 0.154676                     | 341.3648  | 387.7433  | 449.5104  |
|                                            | H                                        | 2.185806  | -0.165078 | 1.217506                     | 535.6229  | 548.4694  | 663.0577  |
|                                            | N                                        | -1.584982 | -0.247187 | 0.143264                     | 707.9277  | 742.2869  | 984.3175  |
|                                            | O                                        | -2.001065 | 0.912063  | -0.428418                    | 1202.1284 | 1256.9179 | 1381.8725 |
|                                            | O                                        | -2.43494  | -0.989006 | 0.440576                     | 1494.3605 | 1649.47   | 1790.7055 |
|                                            | O                                        | 1.303795  | 1.877085  | 0.270134                     | 1802.4148 | 3047.76   | 3165.3322 |
|                                            | H                                        | 0.727601  | 1.120222  | 0.042264                     | 3515.1592 | 3670.689  | 3936.8971 |
|                                            | H                                        | -2.974889 | 0.864562  | -0.465399                    |           |           |           |
|                                            | H                                        | 0.977457  | 2.621578  | -0.236989                    |           |           |           |
|                                            | TS <sup>OAT</sup> <sub>cis-HONO-WD</sub> | O         | 0.333492  | -0.575585                    | 0.304761  | -657.3503 | 23.7703   |
| O                                          |                                          | -1.164766 | -1.140935 | 0.926675                     | 54.8312   | 88.9187   | 102.2188  |
| C                                          |                                          | -1.886063 | -1.463883 | 0.008576                     | 151.3309  | 188.9093  | 204.6116  |
| H                                          |                                          | -2.888166 | -1.837641 | 0.222197                     | 226.6268  | 239.9186  | 265.4359  |
| H                                          |                                          | -1.522678 | -1.416257 | -1.01828                     | 285.6325  | 389.136   | 429.1706  |
| N                                          |                                          | 2.011676  | -0.108544 | -0.26001                     | 450.9471  | 460.7794  | 519.4422  |
| O                                          |                                          | 2.617828  | 0.794453  | 0.544226                     | 601.5302  | 671.0921  | 715.4677  |
| O                                          |                                          | 2.722643  | -0.716509 | -0.959244                    | 805.7719  | 959.1317  | 1003.4298 |
| O                                          |                                          | -0.7896   | 1.837989  | 0.124412                     | 1192.0928 | 1248.2988 | 1389.5676 |
| H                                          |                                          | -0.28745  | 0.990279  | 0.22752                      | 1485.2704 | 1636.3633 | 1658.539  |
| H                                          |                                          | -0.698432 | 2.301844  | 0.958555                     | 1784.6855 | 1784.9749 | 3074.42   |
| O                                          |                                          | -3.112239 | 0.622942  | -0.595143                    | 3185.604  | 3237.1072 | 3462.7603 |
| H                                          |                                          | -3.448288 | 1.006156  | -1.407223                    | 3670.4615 | 3925.5817 | 3927.2872 |
| H                                          |                                          | -2.351403 | 1.182525  | -0.328365                    |           |           |           |
| H                                          | 3.572178                                 | 0.73737   | 0.34872   |                              |           |           |           |
| TS <sup>OAT</sup> <sub>trans-HONO-WM</sub> | O                                        | 0.622396  | -0.081215 | -0.068341                    | -588.5556 | 44.1947   | 62.6929   |
|                                            | O                                        | 2.243784  | 0.352263  | -0.064982                    | 89.2339   | 152.5587  | 202.2913  |
|                                            | C                                        | 2.916696  | -0.639006 | 0.087962                     | 235.1219  | 270.6154  | 354.0464  |
|                                            | H                                        | 4.005145  | -0.540956 | 0.113432                     | 361.6148  | 377.6774  | 477.0292  |
|                                            | H                                        | 2.428242  | -1.610637 | 0.197232                     | 533.2732  | 565.7825  | 775.3988  |
|                                            | N                                        | -1.23674  | -0.71781  | -0.029256                    | 965.5977  | 1043.7314 | 1076.5643 |
|                                            | O                                        | -2.259241 | 0.130059  | 0.090536                     | 1206.6536 | 1246.9819 | 1475.7783 |
|                                            | O                                        | -1.53863  | -1.847093 | -0.054101                    | 1571.0728 | 1644.2169 | 1804.7658 |
|                                            | H                                        | -1.813317 | 1.033366  | 0.094046                     | 1823.0411 | 2943.0689 | 3047.2703 |
|                                            | O                                        | -0.676162 | 2.173738  | 0.091481                     | 3164.059  | 3172.6131 | 3922.3644 |
|                                            | H                                        | -0.00254  | 1.441069  | 0.012722                     |           |           |           |
|                                            | H                                        | -0.597708 | 2.713842  | -0.697165                    |           |           |           |

| compound                                   | Cartesian coordinate(Å) |           |           | frequency(cm <sup>-1</sup> ) |           |           |           |
|--------------------------------------------|-------------------------|-----------|-----------|------------------------------|-----------|-----------|-----------|
| TS <sup>OAT</sup> <sub>trans-HONO-WD</sub> | O                       | -0.194805 | 0.824675  | 0.390252                     | -597.2945 | 42.0853   | 57.657    |
|                                            | O                       | 1.415647  | 1.297491  | 0.724365                     | 107.3479  | 128.2362  | 142.3938  |
|                                            | C                       | 2.03181   | 1.371645  | -0.315965                    | 158.6948  | 175.1211  | 208.2871  |
|                                            | H                       | 3.095212  | 1.615636  | -0.286866                    | 234.2947  | 273.0022  | 297.4539  |
|                                            | H                       | 1.523194  | 1.225578  | -1.268438                    | 353.0973  | 389.7393  | 438.4844  |
|                                            | N                       | -1.946568 | 0.239182  | -0.111313                    | 458.1164  | 514.74    | 558.8572  |
|                                            | O                       | -2.17225  | -1.079564 | -0.260581                    | 592.7272  | 718.0694  | 763.1242  |
|                                            | O                       | -2.832687 | 0.919101  | -0.437667                    | 931.2064  | 1027.5345 | 1196.6166 |
|                                            | H                       | -1.335545 | -1.503095 | 0.065156                     | 1235.9262 | 1248.6544 | 1485.5582 |
|                                            | O                       | 0.260552  | -1.620144 | 0.703242                     | 1535.6802 | 1608.4779 | 1645.528  |
|                                            | H                       | 0.147052  | -0.595188 | 0.701966                     | 1786.8093 | 1841.0669 | 2547.0104 |
|                                            | H                       | 0.336452  | -1.905613 | 1.616519                     | 3074.2284 | 3188.5196 | 3271.1709 |
|                                            | O                       | 2.63921   | -1.047502 | -0.686698                    | 3633.3732 | 3909.2367 | 3929.7413 |
|                                            | H                       | 2.877868  | -1.664292 | -1.381041                    |           |           |           |
|                                            | H                       | 1.86554   | -1.429631 | -0.23562                     |           |           |           |
| TS <sup>HAT</sup> <sub>cis-HONO-WM</sub>   | C                       | -0.496156 | -0.580363 | -1.055982                    | -345.3161 | 23.5011   | 90.3477   |
|                                            | H                       | -0.548275 | -1.004732 | -2.053277                    | 132.1229  | 157.099   | 173.6952  |
|                                            | O                       | -0.951279 | -1.335447 | -0.164885                    | 176.5501  | 196.6968  | 251.8712  |
|                                            | O                       | -0.652712 | -0.829547 | 1.114353                     | 345.5896  | 399.4891  | 429.1786  |
|                                            | N                       | 2.121972  | 0.454435  | -0.110746                    | 575.094   | 759.2135  | 828.2715  |
|                                            | O                       | 1.561918  | -0.70351  | 0.033777                     | 949.8135  | 1095.2665 | 1135.7951 |
|                                            | O                       | 1.396576  | 1.393962  | 0.119025                     | 1168.1828 | 1266.5881 | 1439.6894 |
|                                            | H                       | 0.387054  | -0.678658 | 0.911968                     | 1478.6408 | 1591.4154 | 1617.4709 |
|                                            | H                       | -0.211911 | 0.441285  | -0.839497                    | 1628.5032 | 2249.0876 | 3134.9387 |
|                                            | O                       | -2.265374 | 1.265855  | -0.061307                    | 3282.6287 | 3828.6331 | 3941.1745 |
|                                            | H                       | -1.917506 | 0.988181  | 0.793593                     |           |           |           |
|                                            | H                       | -2.299257 | 2.224559  | -0.029376                    |           |           |           |
| TS <sup>HAT</sup> <sub>cis-HONO-WD</sub>   | C                       | 0.323947  | -0.987738 | 1.184245                     | -358.1694 | 28.1199   | 38.0907   |
|                                            | H                       | 0.224566  | -1.47139  | 2.151271                     | 59.4073   | 115.8296  | 143.3439  |
|                                            | O                       | 0.652187  | -1.780847 | 0.266449                     | 153.7154  | 171.7589  | 197.3067  |
|                                            | O                       | 0.492721  | -1.162129 | -0.993632                    | 211.3758  | 225.9054  | 281.4576  |
|                                            | N                       | -2.255075 | 0.377596  | -0.031754                    | 352.4943  | 370.3739  | 395.6576  |
|                                            | O                       | -1.64855  | -0.764297 | 0.114955                     | 476.4918  | 506.7169  | 572.4257  |
|                                            | O                       | -1.709848 | 1.128767  | -0.798037                    | 649.0689  | 793.3061  | 824.4117  |
|                                            | H                       | -0.533844 | -0.861857 | -0.798071                    | 944.4885  | 1081.6313 | 1161.1862 |
|                                            | H                       | 0.31563   | 0.098514  | 1.045154                     | 1191.5748 | 1265.4286 | 1358.9003 |
|                                            | O                       | 0.515794  | 1.981455  | 0.882776                     | 1461.5486 | 1603.3974 | 1608.2306 |
|                                            | H                       | -0.188411 | 2.204262  | 0.263431                     | 1626.2859 | 1639.2284 | 2141.0713 |
|                                            | H                       | 1.320386  | 1.897697  | 0.352054                     | 2999.5919 | 3229.9341 | 3754.7138 |
|                                            | O                       | 2.601178  | 0.666198  | -0.466713                    | 3785.187  | 3865.3288 | 3937.8884 |
|                                            | H                       | 2.039627  | 0.101854  | -1.014095                    |           |           |           |
|                                            | H                       | 3.436044  | 0.761004  | -0.929318                    |           |           |           |

| compound                                   | Cartesian coordinate(Å)                    |           |           | frequency(cm <sup>-1</sup> ) |           |           |           |
|--------------------------------------------|--------------------------------------------|-----------|-----------|------------------------------|-----------|-----------|-----------|
| TS <sup>HAT</sup> <sub>trans-HONO-WM</sub> | C                                          | 1.131851  | 1.097046  | -0.127723                    | -207.8178 | 54.6514   | 72.2237   |
|                                            | H                                          | 0.913161  | 2.006147  | 0.419037                     | 124.0961  | 149.2527  | 161.7606  |
|                                            | O                                          | 2.045577  | 0.389644  | 0.338572                     | 178.9882  | 213.1795  | 293.9617  |
|                                            | O                                          | 2.148541  | -0.859837 | -0.325391                    | 380.0103  | 428.6608  | 556.8002  |
|                                            | N                                          | -1.227981 | -1.469285 | -0.038051                    | 657.2314  | 710.3583  | 876.4599  |
|                                            | O                                          | -0.176258 | -0.804937 | 0.312994                     | 919.592   | 1037.959  | 1139.2114 |
|                                            | H                                          | 1.14691   | -1.165879 | -0.110016                    | 1162.2381 | 1229.7043 | 1427.799  |
|                                            | H                                          | 0.654944  | 0.853482  | -1.065925                    | 1558.9027 | 1595.0772 | 1640.584  |
|                                            | O                                          | -1.401387 | 1.908748  | -0.057427                    | 1658.9589 | 2194.0293 | 3176.3201 |
|                                            | H                                          | -1.749868 | 1.006407  | 0.069172                     | 3320.9038 | 3593.8469 | 3930.1861 |
|                                            | H                                          | -2.166915 | 2.481339  | -0.130982                    |           |           |           |
|                                            | O                                          | -2.240657 | -0.818464 | -0.037322                    |           |           |           |
|                                            | TS <sup>HAT</sup> <sub>trans-HONO-WD</sub> | C         | 0.092302  | -0.914696                    | 1.092963  | -663.9137 | 28.0429   |
| H                                          |                                            | -0.366987 | -1.364297 | 1.966975                     | 61.6382   | 91.9094   | 110.5355  |
| O                                          |                                            | 0.835092  | -1.705964 | 0.429485                     | 125.0234  | 167.5654  | 176.2259  |
| O                                          |                                            | 1.051104  | -1.124923 | -0.860897                    | 197.6615  | 227.151   | 233.4882  |
| N                                          |                                            | -1.936671 | 0.305857  | -0.662842                    | 293.9531  | 381.7817  | 400.5019  |
| O                                          |                                            | -1.256995 | -0.862073 | -0.330257                    | 418.4713  | 532.3159  | 671.1982  |
| H                                          |                                            | -0.309584 | -0.911022 | -0.9141                      | 733.0329  | 773.7968  | 862.6244  |
| H                                          |                                            | 0.190473  | 0.162578  | 0.986875                     | 890.1205  | 930.2354  | 1041.2444 |
| O                                          |                                            | 0.230878  | 2.090864  | 0.362288                     | 1247.4053 | 1259.9308 | 1342.566  |
| H                                          |                                            | -0.172618 | 2.673441  | -0.283442                    | 1428.9206 | 1584.8769 | 1616.6597 |
| H                                          |                                            | 1.163855  | 1.992864  | 0.108519                     | 1633.2298 | 1812.5573 | 2013.9776 |
| O                                          |                                            | 2.653354  | 0.941914  | -0.134985                    | 3114.8989 | 3253.9635 | 3504.9325 |
| H                                          |                                            | 2.23741   | 0.150141  | -0.531435                    | 3675.9788 | 3933.8795 | 3943.4218 |
| O                                          | 3.580837                                   | 0.934129  | -0.373802 |                              |           |           |           |
| O                                          | -2.678495                                  | 0.62385   | 0.174681  |                              |           |           |           |
| PC <sup>OAT</sup> <sub>cis-HONO-WM</sub>   | O                                          | -1.88332  | -0.681543 | -0.068223                    | 62.9315   | 70.2331   | 82.7143   |
|                                            | O                                          | 1.469252  | -1.143642 | 0.409333                     | 99.8344   | 125.2911  | 143.0814  |
|                                            | C                                          | 0.819444  | -1.979443 | -0.163024                    | 193.4142  | 215.1022  | 272.3164  |
|                                            | H                                          | 0.614512  | -2.95321  | 0.304246                     | 285.9425  | 420.1416  | 604.3872  |
|                                            | H                                          | 0.402899  | -1.799083 | -1.164126                    | 681.4096  | 722.1466  | 841.1204  |
|                                            | N                                          | -1.153944 | 0.260939  | 0.059195                     | 1024.0056 | 1061.4406 | 1229.4761 |
|                                            | O                                          | -0.539808 | 0.666903  | -1.072734                    | 1280.6418 | 1416.4979 | 1510.2125 |
|                                            | O                                          | -0.906436 | 0.867052  | 1.07005                      | 1542.6631 | 1637.0292 | 1772.5446 |
|                                            | O                                          | 1.670518  | 1.633388  | -0.161673                    | 1842.7576 | 2916.3993 | 2991.6762 |
|                                            | H                                          | 1.903651  | 0.733202  | 0.11975                      | 3082.0797 | 3713.9838 | 3897.8343 |
|                                            | H                                          | 0.256072  | 1.210767  | -0.760381                    |           |           |           |
| H                                          | 1.502166                                   | 2.121147  | 0.650272  |                              |           |           |           |

| compound                          | Cartesian coordinate(Å) |           |           | frequency( $\text{cm}^{-1}$ ) |           |           |           |
|-----------------------------------|-------------------------|-----------|-----------|-------------------------------|-----------|-----------|-----------|
| $\text{PC}_{cis-HONO-WD}^{OAT}$   | O                       | -2.708923 | 0.727727  | 0.738475                      | 27.5965   | 40.3449   | 70.2437   |
|                                   | O                       | 2.959764  | -0.089428 | 0.399089                      | 92.3741   | 103.5974  | 111.7754  |
|                                   | C                       | 2.383626  | 0.904051  | 0.766538                      | 131.9312  | 148.5391  | 156.8832  |
|                                   | H                       | 2.87831   | 1.884019  | 0.742246                      | 206.5134  | 226.7443  | 249.1071  |
|                                   | H                       | 1.353491  | 0.870693  | 1.143451                      | 273.3059  | 307.0317  | 328.6904  |
|                                   | N                       | -1.924428 | 0.009327  | 0.201315                      | 486.8507  | 507.939   | 663.302   |
|                                   | O                       | -0.981804 | -0.523356 | 1.011973                      | 722.2656  | 746.7185  | 837.6621  |
|                                   | O                       | -1.875056 | -0.297145 | -0.966797                     | 991.6163  | 1025.8103 | 1223.8378 |
|                                   | O                       | 0.918459  | -1.623975 | -0.410229                     | 1283.0045 | 1411.2321 | 1461.7727 |
|                                   | H                       | 1.781522  | -1.290447 | -0.084528                     | 1545.8585 | 1617.6056 | 1629.3595 |
|                                   | H                       | 1.014613  | -2.550173 | -0.640325                     | 1780.4911 | 1831.4432 | 3004.8485 |
|                                   | O                       | 0.689536  | 1.159972  | -1.324156                     | 3096.9121 | 3112.2541 | 3473.3854 |
|                                   | H                       | -0.088385 | 1.572054  | -1.708337                     | 3811.0318 | 3923.5146 | 3927.0793 |
|                                   | H                       | 0.561265  | 0.213764  | -1.464664                     |           |           |           |
|                                   | H                       | -0.347379 | -1.019856 | 0.416873                      |           |           |           |
| $\text{PC}_{trans-HONO-WM}^{OAT}$ | O                       | 0.436944  | -0.812614 | -0.089229                     | 37.2272   | 52.0608   | 69.6122   |
|                                   | O                       | -2.643307 | -0.025536 | 0.191553                      | 78.2895   | 122.44    | 168.6824  |
|                                   | C                       | -2.582879 | -1.195757 | -0.08194                      | 180.3468  | 203.4158  | 264.5299  |
|                                   | H                       | -3.446606 | -1.85386  | 0.09389                       | 302.5245  | 478.3956  | 672.1468  |
|                                   | H                       | -1.674935 | -1.640674 | -0.507072                     | 721.3259  | 727.7706  | 840.9897  |
|                                   | N                       | 1.567292  | -0.378602 | 0.005765                      | 981.1311  | 1047.1122 | 1238.5385 |
|                                   | O                       | 1.705146  | 0.954977  | 0.02336                       | 1286.9689 | 1410.1915 | 1537.0731 |
|                                   | O                       | 2.576187  | -1.007827 | 0.086315                      | 1542.5584 | 1642.6907 | 1790.5559 |
|                                   | H                       | 0.765743  | 1.335337  | -0.042261                     | 1843.1179 | 2876.9606 | 2994.5609 |
|                                   | O                       | -0.677244 | 1.908329  | -0.144352                     | 3098.0474 | 3575.492  | 3924.8607 |
|                                   | H                       | -1.33404  | 1.195278  | -0.02577                      |           |           |           |
|                                   | H                       | -0.965743 | 2.650034  | 0.39133                       |           |           |           |
| $\text{PC}_{trans-HONO-WD}^{OAT}$ | O                       | 0.702805  | -0.749804 | -0.383919                     | -32.3285  | 39.3926   | 47.6063   |
|                                   | O                       | -2.192249 | -0.530836 | 1.13177                       | 71.8919   | 78.7142   | 92.3548   |
|                                   | C                       | -2.355562 | -1.339325 | 0.251537                      | 116.8618  | 151.2743  | 163.0409  |
|                                   | H                       | -2.906934 | -2.26871  | 0.453173                      | 184.2474  | 198.6761  | 226.2046  |
|                                   | H                       | -1.972075 | -1.163684 | -0.760209                     | 286.9786  | 350.467   | 360.7375  |
|                                   | N                       | 1.786636  | -0.355507 | 0.003264                      | 459.9478  | 551.5989  | 687.4561  |
|                                   | O                       | 1.812113  | 0.842863  | 0.609864                      | 725.386   | 828.6054  | 841.7552  |
|                                   | O                       | 2.833623  | -0.910893 | -0.094032                     | 981.0617  | 1041.3743 | 1243.1138 |
|                                   | H                       | 0.854524  | 1.162916  | 0.638329                      | 1291.1836 | 1403.7551 | 1530.9769 |
|                                   | O                       | -0.66066  | 1.647284  | 0.693238                      | 1539.1567 | 1643.7644 | 1650.1998 |
|                                   | H                       | -1.21893  | 0.853393  | 0.866331                      | 1791.0506 | 1828.5022 | 2960.3488 |
|                                   | H                       | -0.919088 | 2.319646  | 1.328436                      | 2998.2618 | 3114.6131 | 3377.0463 |
|                                   | O                       | -1.311609 | 0.70568   | -2.042316                     | 3830.8053 | 3906.0975 | 3911.8271 |
|                                   | H                       | -0.481126 | 0.220752  | -2.025531                     |           |           |           |
|                                   | H                       | -1.201638 | 1.365833  | -1.349429                     |           |           |           |

| compound                                   | Cartesian coordinate(Å)                  |           |           | frequency(cm <sup>-1</sup> ) |           |           |           |
|--------------------------------------------|------------------------------------------|-----------|-----------|------------------------------|-----------|-----------|-----------|
| PC <sup>HAT</sup> <sub>cis-HONO-WM</sub>   | C                                        | 0.35807   | -0.681476 | -0.901439                    | 45.7938   | 77.2556   | 107.5965  |
|                                            | H                                        | 0.600665  | -1.220481 | -1.813915                    | 123.0879  | 130.6272  | 154.0945  |
|                                            | O                                        | -0.289055 | -1.62426  | -0.102338                    | 225.2284  | 240.3128  | 248.7398  |
|                                            | O                                        | -0.76121  | -0.949985 | 1.057252                     | 351.4819  | 431.4096  | 458.2311  |
|                                            | N                                        | 1.664394  | 0.949236  | 0.329777                     | 594.5138  | 698.3387  | 891.762   |
|                                            | O                                        | 1.591106  | -0.294509 | -0.318647                    | 959.8193  | 1012.6139 | 1117.6373 |
|                                            | O                                        | 0.697477  | 1.593491  | 0.295438                     | 1183.4288 | 1325.9992 | 1407.1963 |
|                                            | H                                        | -0.19916  | -1.324647 | 1.74682                      | 1430.5781 | 1496.0269 | 1630.4613 |
|                                            | H                                        | -0.281074 | 0.178289  | -1.086931                    | 1803.1363 | 3123.1607 | 3190.0186 |
|                                            | O                                        | -2.438527 | 0.977354  | -0.420312                    | 3825.8749 | 3835.676  | 3939.3747 |
|                                            | H                                        | -2.189135 | 0.361722  | 0.27707                      |           |           |           |
|                                            | H                                        | -2.128817 | 1.832593  | -0.113995                    |           |           |           |
|                                            | PC <sup>HAT</sup> <sub>cis-HONO-WD</sub> | C         | -0.264504 | 0.41919                      | 0.582305  | 22.5055   | 25.2341   |
| H                                          |                                          | 0.281395  | 0.978138  | 1.335522                     | 110.7585  | 120.068   | 159.482   |
| O                                          |                                          | -0.185426 | -0.940322 | 0.894721                     | 160.2219  | 193.6818  | 213.603   |
| O                                          |                                          | 0.077644  | -1.709063 | -0.267628                    | 227.2673  | 264.5139  | 280.2285  |
| N                                          |                                          | -2.514962 | 0.573457  | -0.225759                    | 339.91    | 373.9821  | 410.6575  |
| O                                          |                                          | -1.604567 | 0.919486  | 0.714153                     | 468.1901  | 553.5536  | 561.8399  |
| O                                          |                                          | -2.14267  | -0.214236 | -1.020339                    | 690.4434  | 771.998   | 930.2364  |
| H                                          |                                          | -0.749552 | -1.640513 | -0.769083                    | 973.5932  | 1003.6749 | 1126.947  |
| H                                          |                                          | 0.125677  | 0.62022   | -0.41231                     | 1154.4919 | 1332.194  | 1420.9383 |
| O                                          |                                          | 2.193294  | 1.877243  | -0.347117                    | 1443.5859 | 1461.7848 | 1632.8654 |
| H                                          |                                          | 2.855954  | 2.425911  | -0.769368                    | 1642.285  | 1728.9386 | 3130.9809 |
| H                                          |                                          | 2.56625   | 0.981526  | -0.31112                     | 3204.7739 | 3675.9813 | 3767.8954 |
| O                                          |                                          | 2.797648  | -0.857068 | -0.142202                    | 3780.4391 | 3927.4702 | 3938.2884 |
| H                                          | 1.96922                                  | -1.30663  | -0.357722 |                              |           |           |           |
| H                                          | 3.055434                                 | -1.196314 | 0.71786   |                              |           |           |           |
| PC <sup>HAT</sup> <sub>trans-HONO-WM</sub> | C                                        | -0.373943 | 0.338838  | -0.210442                    | 28.2609   | 68.7682   | 89.8523   |
|                                            | H                                        | 0.30915   | 0.70937   | -0.971878                    | 134.7105  | 153.1824  | 165.375   |
|                                            | O                                        | -1.621754 | 0.829008  | -0.512537                    | 195.5537  | 266.7395  | 291.818   |
|                                            | O                                        | -2.466912 | 0.576545  | 0.600701                     | 317.8242  | 348.2428  | 422.0009  |
|                                            | N                                        | 0.627187  | -1.817113 | 3.2×10 <sup>-05</sup>        | 566.1786  | 805.1337  | 964.8631  |
|                                            | O                                        | -0.476777 | -1.105097 | -0.287113                    | 992.5468  | 1034.3555 | 1127.3444 |
|                                            | H                                        | -2.884748 | -0.25783  | 0.348748                     | 1188.8711 | 1306.5444 | 1415.971  |
|                                            | H                                        | -0.046687 | 0.621894  | 0.788275                     | 1433.0755 | 1476.8963 | 1608.8263 |
|                                            | O                                        | 2.330251  | 1.703325  | 0.042147                     | 1717.5682 | 3106.874  | 3179.1476 |
|                                            | H                                        | 2.51423   | 0.779966  | 0.23764                      | 3807.3075 | 3852.6993 | 3958.9939 |
|                                            | H                                        | 3.16069   | 2.169175  | 0.156576                     |           |           |           |
|                                            | O                                        | 1.585281  | -1.170757 | 0.244685                     |           |           |           |



| compound                                        | Cartesian coordinate(Å) |           |                        | frequency(cm <sup>-1</sup> ) |           |           |           |
|-------------------------------------------------|-------------------------|-----------|------------------------|------------------------------|-----------|-----------|-----------|
| <i>PC<sup>HAT</sup><sub>trans-HONO-WD</sub></i> | C                       | -2.051206 | 0.582435               | 0.002964                     | 33.3505   | 64.9223   | 77.5755   |
|                                                 | O                       | -2.121157 | -0.78604               | -0.111801                    | 97.5754   | 120.1146  | 143.3446  |
|                                                 | O                       | -0.834394 | 1.081116               | -0.562307                    | 149.3599  | 204.5044  | 216.4593  |
|                                                 | O                       | -1.260398 | -1.341465              | 0.872622                     | 233.2818  | 277.9893  | 296.8189  |
|                                                 | N                       | 0.099099  | 1.330148               | 0.411283                     | 334.0892  | 359.605   | 437.9544  |
|                                                 | O                       | 1.134989  | 1.598144               | -0.064302                    | 467.1753  | 559.324   | 681.7459  |
|                                                 | H                       | -2.856182 | 0.982239               | -0.608041                    | 736.2126  | 784.2782  | 892.8559  |
|                                                 | H                       | -2.105895 | 0.903474               | 1.042632                     | 971.9914  | 1075.089  | 1160.1214 |
|                                                 | H                       | -0.456078 | -1.533062              | 0.336147                     | 1201.377  | 1334.8895 | 1425.2974 |
|                                                 | H                       | 0.63133   | -0.924623              | -1.501544                    | 1481.5917 | 1575.3734 | 1607.2649 |
|                                                 | H                       | 1.722345  | -1.221671              | -0.449897                    | 1641.2701 | 1786.2298 | 3101.9275 |
|                                                 | H                       | 2.958335  | 0.526728               | 0.486977                     | 3180.2692 | 3402.5702 | 3672.1487 |
|                                                 | H                       | 4.098593  | -0.456774              | 0.150527                     | 3843.9236 | 3901.191  | 3953.936  |
|                                                 | O                       | 0.868211  | -1.53165               | -0.794963                    |           |           |           |
|                                                 | O                       | 3.165386  | -0.405349              | 0.366555                     |           |           |           |
| HNO <sub>3</sub>                                | O                       | -1.055546 | -0.718561              | -0.000172                    | 507.2984  | 621.9768  | 706.3832  |
|                                                 | N                       | -0.140911 | 0.035973               | 0.000136                     | 825.2843  | 983.1121  | 1359.1869 |
|                                                 | O                       | 1.09695   | -0.571722              | 0.000258                     | 1415.6371 | 1808.505  | 3779.9411 |
|                                                 | O                       | -0.13275  | 1.237065               | 5.2×10 <sup>-05</sup>        |           |           |           |
|                                                 | H                       | 1.717148  | 0.173924               | -0.002052                    |           |           |           |
| CH <sub>2</sub> O                               | O                       | 0.670376  | -8.3×10 <sup>-05</sup> | 7×10 <sup>-06</sup>          | 1213.3136 | 1274.14   | 1539.5236 |
|                                                 | C                       | -0.525586 | 3×10 <sup>-06</sup>    | -2.9×10 <sup>-05</sup>       | 1869.3614 | 2944.8969 | 3015.8701 |
|                                                 | H                       | -1.104128 | 0.939254               | 5.9×10 <sup>-05</sup>        |           |           |           |
|                                                 | H                       | -1.105367 | -0.938613              | 5.9×10 <sup>-05</sup>        |           |           |           |
| CH <sub>3</sub> NO <sub>4</sub><br>(HPMN)       | C                       | -0.56368  | 0.890853               | 0.204982                     | 79.735    | 156.3855  | 182.7558  |
|                                                 | H                       | -1.067181 | 1.191554               | 1.120593                     | 265.5722  | 331.2679  | 460.7702  |
|                                                 | H                       | -0.209139 | 1.739056               | -0.379333                    | 576.7098  | 705.3853  | 837.4167  |
|                                                 | O                       | -1.428301 | 0.203462               | -0.635105                    | 963.2505  | 1093.2376 | 1133.4987 |
|                                                 | O                       | -2.12589  | -0.748955              | 0.153027                     | 1198.5341 | 1335.1726 | 1416.547  |
|                                                 | O                       | 0.52709   | 0.082189               | 0.602201                     | 1427.9949 | 1478.4295 | 1846.4026 |
|                                                 | N                       | 1.566402  | 0.181558               | -0.340685                    | 3104.6829 | 3174.7255 | 3807.7072 |
|                                                 | O                       | 2.433983  | -0.538772              | -0.078309                    |           |           |           |
| H                                               | -1.561475               | -1.530021 | 0.079135               |                              |           |           |           |

Table S2: Termolecular rate constant  $k_t$  in ( $\text{cm}^6 \text{ molecule}^{-2} \text{ sec}^{-1}$ ) for  $\text{H}_2\text{O}$  catalyzed channels for OAT path for  $\text{CH}_2\text{OO} + \text{cis-HONO}$  within temperature range 213-320K.

| Temp (K) | PATH A   |          |          |          | PATH B   |          |          |          | PATH C   |          |          |          |
|----------|----------|----------|----------|----------|----------|----------|----------|----------|----------|----------|----------|----------|
|          | keq1     | keq2     | kuni     | kt       | keq1     | keq2     | kuni     | kt       | keq1     | keq2     | kuni     | kt       |
| 213      | 1.66E-18 | 5.76E-18 | 1.15E-12 | 1.10E-47 | 7.88E-20 | 1.21E-16 | 1.15E-12 | 1.10E-47 | 4.38E-19 | 2.19E-17 | 1.15E-12 | 1.10E-47 |
| 216      | 1.28E-18 | 4.31E-18 | 2.53E-12 | 1.39E-47 | 6.48E-20 | 8.48E-17 | 2.53E-12 | 1.39E-47 | 3.47E-19 | 1.58E-17 | 2.53E-12 | 1.39E-47 |
| 219      | 9.88E-19 | 3.25E-18 | 5.46E-12 | 1.75E-47 | 5.36E-20 | 5.99E-17 | 5.46E-12 | 1.75E-47 | 2.77E-19 | 1.16E-17 | 5.46E-12 | 1.75E-47 |
| 224      | 6.55E-19 | 2.07E-18 | 1.89E-11 | 2.56E-47 | 3.95E-20 | 3.42E-17 | 1.89E-11 | 2.56E-47 | 1.93E-19 | 7.02E-18 | 1.89E-11 | 2.56E-47 |
| 235      | 2.83E-19 | 8.17E-19 | 2.41E-10 | 5.58E-47 | 2.12E-20 | 1.09E-17 | 2.41E-10 | 5.58E-47 | 9.20E-20 | 2.52E-18 | 2.41E-10 | 5.58E-47 |
| 250      | 1.03E-19 | 2.65E-19 | 5.51E-09 | 1.49E-46 | 9.99E-21 | 2.72E-18 | 5.51E-09 | 1.49E-46 | 3.74E-20 | 7.25E-19 | 5.51E-09 | 1.49E-46 |
| 259      | 5.92E-20 | 1.44E-19 | 3.04E-08 | 2.58E-46 | 6.65E-21 | 1.28E-18 | 3.04E-08 | 2.58E-46 | 2.30E-20 | 3.69E-19 | 3.04E-08 | 2.58E-46 |
| 265      | 4.20E-20 | 9.77E-20 | 8.93E-08 | 3.66E-46 | 5.15E-21 | 7.96E-19 | 8.93E-08 | 3.66E-46 | 1.69E-20 | 2.42E-19 | 8.93E-08 | 3.66E-46 |
| 278      | 2.10E-20 | 4.52E-20 | 7.90E-07 | 7.50E-46 | 3.09E-21 | 3.07E-19 | 7.90E-07 | 7.50E-46 | 9.17E-21 | 1.04E-19 | 7.90E-07 | 7.50E-46 |
| 280      | 1.90E-20 | 4.04E-20 | 1.09E-06 | 8.37E-46 | 2.87E-21 | 2.67E-19 | 1.09E-06 | 8.37E-46 | 8.39E-21 | 9.15E-20 | 1.09E-06 | 8.37E-46 |
| 290      | 1.18E-20 | 2.36E-20 | 4.99E-06 | 1.39E-45 | 2.02E-21 | 1.38E-19 | 4.99E-06 | 1.39E-45 | 5.48E-21 | 5.08E-20 | 4.99E-06 | 1.39E-45 |
| 298      | 8.25E-21 | 1.58E-20 | 1.58E-05 | 2.06E-45 | 1.55E-21 | 8.41E-20 | 1.58E-05 | 2.06E-45 | 3.99E-21 | 3.27E-20 | 1.58E-05 | 2.06E-45 |
| 300      | 7.57E-21 | 1.43E-20 | 2.08E-05 | 2.26E-45 | 1.45E-21 | 7.46E-20 | 2.08E-05 | 2.26E-45 | 3.69E-21 | 2.94E-20 | 2.08E-05 | 2.26E-45 |
| 310      | 5.01E-21 | 9.00E-21 | 7.93E-05 | 3.58E-45 | 1.07E-21 | 4.20E-20 | 7.93E-05 | 3.58E-45 | 2.56E-21 | 1.76E-20 | 7.93E-05 | 3.58E-45 |
| 320      | 3.41E-21 | 5.83E-21 | 2.79E-04 | 5.55E-45 | 8.09E-22 | 2.46E-20 | 2.79E-04 | 5.56E-45 | 1.82E-21 | 1.10E-20 | 2.79E-04 | 5.55E-45 |

Table S3: Termolecular rate constant  $k_t$  in ( $\text{cm}^6 \text{ molecule}^{-2} \text{ sec}^{-1}$ ) for  $\text{H}_2\text{O}$  catalyzed channels for OAT path for  $\text{CH}_2\text{OO} + \text{trans-HONO}$  within temperature range 213-320K.

| Temp (K) | PATH A   |          |          |          | PATH B   |          |          |          | PATH C   |          |          |          |
|----------|----------|----------|----------|----------|----------|----------|----------|----------|----------|----------|----------|----------|
|          | keq1     | keq2     | kuni     | kt       | keq1     | keq2     | kuni     | kt       | keq1     | keq2     | kuni     | kt       |
| 213      | 6.19E-18 | 5.27E-17 | 3.38E-06 | 1.10E-39 | 3.10E-22 | 1.05E-12 | 3.38E-06 | 1.10E-39 | 4.38E-19 | 7.45E-16 | 3.38E-06 | 1.10E-39 |
| 216      | 4.58E-18 | 3.97E-17 | 5.77E-06 | 1.05E-39 | 2.93E-22 | 6.21E-13 | 5.77E-06 | 1.05E-39 | 3.47E-19 | 5.24E-16 | 5.77E-06 | 1.05E-39 |
| 219      | 3.42E-18 | 3.02E-17 | 9.71E-06 | 1.00E-39 | 2.77E-22 | 3.73E-13 | 9.71E-06 | 1.00E-39 | 2.77E-19 | 3.73E-16 | 9.71E-06 | 1.00E-39 |
| 224      | 2.14E-18 | 1.94E-17 | 2.25E-05 | 9.35E-40 | 2.53E-22 | 1.64E-13 | 2.25E-05 | 9.35E-40 | 1.93E-19 | 2.16E-16 | 2.25E-05 | 9.35E-40 |
| 235      | 8.21E-19 | 7.88E-18 | 1.26E-04 | 8.15E-40 | 2.11E-22 | 3.07E-14 | 1.26E-04 | 8.15E-40 | 9.20E-20 | 7.04E-17 | 1.26E-04 | 8.15E-40 |
| 250      | 2.57E-19 | 2.63E-18 | 1.05E-03 | 7.08E-40 | 1.71E-22 | 3.95E-15 | 1.05E-03 | 7.08E-40 | 3.74E-20 | 1.80E-17 | 1.05E-03 | 7.07E-40 |
| 259      | 1.37E-19 | 1.45E-18 | 3.32E-03 | 6.57E-40 | 1.53E-22 | 1.30E-15 | 3.32E-03 | 6.57E-40 | 2.30E-20 | 8.61E-18 | 3.32E-03 | 6.57E-40 |
| 265      | 9.21E-20 | 9.96E-19 | 6.88E-03 | 6.31E-40 | 1.43E-22 | 6.43E-16 | 6.88E-03 | 6.31E-40 | 1.69E-20 | 5.41E-18 | 6.88E-03 | 6.31E-40 |
| 278      | 4.17E-20 | 4.69E-19 | 3.00E-02 | 5.86E-40 | 1.25E-22 | 1.57E-16 | 3.00E-02 | 5.86E-40 | 9.17E-21 | 2.13E-18 | 3.00E-02 | 5.86E-40 |
| 280      | 3.71E-20 | 4.21E-19 | 3.72E-02 | 5.81E-40 | 1.23E-22 | 1.27E-16 | 3.72E-02 | 5.81E-40 | 8.39E-21 | 1.86E-18 | 3.72E-02 | 5.81E-40 |
| 290      | 2.14E-20 | 2.49E-19 | 1.04E-01 | 5.55E-40 | 1.12E-22 | 4.76E-17 | 1.04E-01 | 5.55E-40 | 5.48E-21 | 9.74E-19 | 1.04E-01 | 5.55E-40 |
| 298      | 1.42E-20 | 1.69E-19 | 2.26E-01 | 5.40E-40 | 1.05E-22 | 2.27E-17 | 2.26E-01 | 5.40E-40 | 3.99E-21 | 5.99E-19 | 2.26E-01 | 5.40E-40 |
| 300      | 1.29E-20 | 1.53E-19 | 2.73E-01 | 5.38E-40 | 1.04E-22 | 1.90E-17 | 2.73E-01 | 5.37E-40 | 3.69E-21 | 5.33E-19 | 2.73E-01 | 5.38E-40 |
| 310      | 7.98E-21 | 9.74E-20 | 6.72E-01 | 5.22E-40 | 9.64E-23 | 8.07E-18 | 6.72E-01 | 5.22E-40 | 2.56E-21 | 3.04E-19 | 6.72E-01 | 5.23E-40 |
| 320      | 5.12E-21 | 6.38E-20 | 1.57E+00 | 5.13E-40 | 9.04E-23 | 3.62E-18 | 1.57E+00 | 5.13E-40 | 1.82E-21 | 1.80E-19 | 1.57E+00 | 5.13E-40 |

Table S4: Termolecular rate constant  $k_t$  in ( $\text{cm}^6 \text{ molecule}^{-2} \text{ sec}^{-1}$ ) for  $(\text{H}_2\text{O})_2$  catalyzed channels for OAT path for  $\text{CH}_2\text{OO} + \text{cis-HONO}$  within temperature range 213-320K.

| Temp (K) | PATH A   |          |          |          | PATH B   |           |          |          | PATH C   |          |          |          |
|----------|----------|----------|----------|----------|----------|-----------|----------|----------|----------|----------|----------|----------|
|          | keq1     | keq2     | kuni     | kt       | keq1     | keq2      | kuni     | kt       | keq1     | keq2     | kuni     | kt       |
| 213      | 1.66E-18 | 1.82E-14 | 1.02E-11 | 3.08E-43 | 1.06E-17 | 2.852E-15 | 1.02E-11 | 3.08E-43 | 6.50E-16 | 4.65E-17 | 1.02E-11 | 3.08E-43 |
| 216      | 1.28E-18 | 1.11E-14 | 2.21E-11 | 3.14E-43 | 7.60E-18 | 1.866E-15 | 2.21E-11 | 3.13E-43 | 4.28E-16 | 3.31E-17 | 2.21E-11 | 3.13E-43 |
| 219      | 9.88E-19 | 6.89E-15 | 4.68E-11 | 3.18E-43 | 5.51E-18 | 1.235E-15 | 4.68E-11 | 3.18E-43 | 2.86E-16 | 2.38E-17 | 4.68E-11 | 3.18E-43 |
| 224      | 6.55E-19 | 3.19E-15 | 1.58E-10 | 3.30E-43 | 3.28E-18 | 6.369E-16 | 1.58E-10 | 3.30E-43 | 1.49E-16 | 1.40E-17 | 1.58E-10 | 3.30E-43 |
| 235      | 2.83E-19 | 6.58E-16 | 1.91E-09 | 3.56E-43 | 1.14E-18 | 1.641E-16 | 1.91E-09 | 3.56E-43 | 3.92E-17 | 4.75E-18 | 1.91E-09 | 3.56E-43 |
| 250      | 1.03E-19 | 9.56E-17 | 4.08E-08 | 4.00E-43 | 3.12E-19 | 3.139E-17 | 4.08E-08 | 4.00E-43 | 7.70E-18 | 1.27E-18 | 4.08E-08 | 4.00E-43 |
| 259      | 5.92E-20 | 3.35E-17 | 2.17E-07 | 4.30E-43 | 1.55E-19 | 1.278E-17 | 2.17E-07 | 4.30E-43 | 3.18E-18 | 6.24E-19 | 2.17E-07 | 4.30E-43 |
| 265      | 4.20E-20 | 1.73E-17 | 6.24E-07 | 4.53E-43 | 9.99E-20 | 7.271E-18 | 6.24E-07 | 4.53E-43 | 1.82E-18 | 3.99E-19 | 6.24E-07 | 4.53E-43 |
| 278      | 2.10E-20 | 4.57E-18 | 5.28E-06 | 5.08E-43 | 4.12E-20 | 2.332E-18 | 5.28E-06 | 5.07E-43 | 5.93E-19 | 1.62E-19 | 5.28E-06 | 5.08E-43 |
| 280      | 1.90E-20 | 3.77E-18 | 7.21E-06 | 5.16E-43 | 3.62E-20 | 1.977E-18 | 7.21E-06 | 5.17E-43 | 5.03E-19 | 1.42E-19 | 7.21E-06 | 5.16E-43 |
| 290      | 1.18E-20 | 1.49E-18 | 3.21E-05 | 5.64E-43 | 1.96E-20 | 8.961E-19 | 3.21E-05 | 5.64E-43 | 2.30E-19 | 7.62E-20 | 3.21E-05 | 5.64E-43 |
| 298      | 8.25E-21 | 7.41E-19 | 9.90E-05 | 6.06E-43 | 1.24E-20 | 4.949E-19 | 9.90E-05 | 6.06E-43 | 1.28E-19 | 4.77E-20 | 9.90E-05 | 6.05E-43 |
| 300      | 7.57E-21 | 6.26E-19 | 1.30E-04 | 6.16E-43 | 1.11E-20 | 4.288E-19 | 1.30E-04 | 6.17E-43 | 1.11E-19 | 4.26E-20 | 1.30E-04 | 6.16E-43 |
| 310      | 5.01E-21 | 2.79E-19 | 4.82E-04 | 6.74E-43 | 6.49E-21 | 2.155E-19 | 4.82E-04 | 6.74E-43 | 5.63E-20 | 2.48E-20 | 4.82E-04 | 6.74E-43 |
| 320      | 3.41E-21 | 1.31E-19 | 1.65E-03 | 7.36E-43 | 3.94E-21 | 1.132E-19 | 1.65E-03 | 7.36E-43 | 2.98E-20 | 1.50E-20 | 1.65E-03 | 7.36E-43 |

Table S5: Termolecular rate constant  $k_t$  in ( $\text{cm}^6 \text{ molecule}^{-2} \text{ sec}^{-1}$ ) for  $(\text{H}_2\text{O})_2$  catalyzed channels for OAT path for  $\text{CH}_2\text{OO} + \text{trans-HONO}$  within temperature range 213-320K.

| Temp (K) | PATH A   |          |          |          | PATH B   |          |          |          | PATH C   |          |          |          |
|----------|----------|----------|----------|----------|----------|----------|----------|----------|----------|----------|----------|----------|
|          | keq1     | keq2     | kuni     | kt       | keq1     | keq2     | kuni     | kt       | keq1     | keq2     | kuni     | kt       |
| 213      | 6.19E-18 | 2.55E-16 | 2.96E-05 | 4.66E-38 | 1.48E-17 | 1.07E-16 | 2.96E-05 | 4.66E-38 | 6.50E-16 | 2.42E-18 | 2.96E-05 | 4.66E-38 |
| 216      | 4.58E-18 | 1.70E-16 | 4.91E-05 | 3.82E-38 | 1.08E-17 | 7.21E-17 | 4.91E-05 | 3.82E-38 | 4.28E-16 | 1.81E-18 | 4.91E-05 | 3.81E-38 |
| 219      | 3.42E-18 | 1.14E-16 | 8.04E-05 | 3.14E-38 | 7.94E-18 | 4.92E-17 | 8.04E-05 | 3.14E-38 | 2.86E-16 | 1.37E-18 | 8.04E-05 | 3.14E-38 |
| 224      | 2.14E-18 | 6.06E-17 | 1.78E-04 | 2.31E-38 | 4.86E-18 | 2.67E-17 | 1.78E-04 | 2.31E-38 | 1.49E-16 | 8.71E-19 | 1.78E-04 | 2.31E-38 |
| 235      | 8.21E-19 | 1.65E-17 | 9.11E-04 | 1.24E-38 | 1.78E-18 | 7.61E-18 | 9.11E-04 | 1.24E-38 | 3.92E-17 | 3.46E-19 | 9.11E-04 | 1.24E-38 |
| 250      | 2.57E-19 | 3.38E-18 | 6.75E-03 | 5.85E-39 | 5.26E-19 | 1.65E-18 | 6.75E-03 | 5.85E-39 | 7.70E-18 | 1.13E-19 | 6.75E-03 | 5.85E-39 |
| 259      | 1.37E-19 | 1.43E-18 | 2.02E-02 | 3.93E-39 | 2.71E-19 | 7.17E-19 | 2.02E-02 | 3.93E-39 | 3.18E-18 | 6.13E-20 | 2.02E-02 | 3.93E-39 |
| 265      | 9.21E-20 | 8.28E-19 | 4.02E-02 | 3.07E-39 | 1.79E-19 | 4.26E-19 | 4.02E-02 | 3.07E-39 | 1.82E-18 | 4.19E-20 | 4.02E-02 | 3.07E-39 |
| 278      | 4.17E-20 | 2.77E-19 | 1.62E-01 | 1.87E-39 | 7.77E-20 | 1.49E-19 | 1.62E-01 | 1.87E-39 | 5.93E-19 | 1.95E-20 | 1.62E-01 | 1.87E-39 |
| 280      | 3.71E-20 | 2.37E-19 | 1.99E-01 | 1.75E-39 | 6.88E-20 | 1.28E-19 | 1.99E-01 | 1.75E-39 | 5.03E-19 | 1.75E-20 | 1.99E-01 | 1.75E-39 |
| 290      | 2.14E-20 | 1.10E-19 | 5.28E-01 | 1.25E-39 | 3.85E-20 | 6.14E-20 | 5.28E-01 | 1.25E-39 | 2.30E-19 | 1.03E-20 | 5.28E-01 | 1.25E-39 |
| 298      | 1.42E-20 | 6.23E-20 | 1.10E+00 | 9.73E-40 | 2.49E-20 | 3.55E-20 | 1.10E+00 | 9.72E-40 | 1.28E-19 | 6.90E-21 | 1.10E+00 | 9.72E-40 |
| 300      | 1.29E-20 | 5.43E-20 | 1.31E+00 | 9.14E-40 | 2.24E-20 | 3.11E-20 | 1.31E+00 | 9.13E-40 | 1.11E-19 | 6.27E-21 | 1.31E+00 | 9.13E-40 |
| 310      | 7.98E-21 | 2.80E-20 | 3.09E+00 | 6.90E-40 | 1.36E-20 | 1.65E-20 | 3.09E+00 | 6.90E-40 | 5.63E-20 | 3.96E-21 | 3.09E+00 | 6.90E-40 |
| 320      | 5.12E-21 | 1.50E-20 | 6.90E+00 | 5.31E-40 | 8.48E-21 | 9.07E-21 | 6.90E+00 | 5.31E-40 | 2.98E-20 | 2.58E-21 | 6.90E+00 | 5.31E-40 |

Table S6: Bimolecular rate constant  $k_b$  in ( $\text{cm}^3 \text{ molecule}^{-1} \text{ sec}^{-1}$ ) for  $\text{H}_2\text{O}$  catalyzed channels for OAT path for  $\text{CH}_2\text{OO} + \text{cis/trans-HONO}$  within temperature range 213-320K.

| cis-HONO |          |          |          | trans-HONO |          |          |          |
|----------|----------|----------|----------|------------|----------|----------|----------|
| Temp (K) | Path A   | Path B   | Path C   | Temp (K)   | Path A   | Path B   | Path C   |
| 213      | 6.62E-30 | 1.39E-28 | 2.51E-29 | 213        | 1.78E-22 | 3.55E-18 | 2.52E-21 |
| 216      | 1.09E-29 | 2.15E-28 | 4.01E-29 | 216        | 2.29E-22 | 3.59E-18 | 3.02E-21 |
| 219      | 1.77E-29 | 3.27E-28 | 6.33E-29 | 219        | 2.93E-22 | 3.62E-18 | 3.62E-21 |
| 224      | 3.90E-29 | 6.47E-28 | 1.33E-28 | 224        | 4.37E-22 | 3.70E-18 | 4.85E-21 |
| 235      | 1.97E-28 | 2.63E-27 | 6.07E-28 | 235        | 9.93E-22 | 3.86E-18 | 8.86E-21 |
| 250      | 1.46E-27 | 1.50E-26 | 3.99E-27 | 250        | 2.76E-21 | 4.15E-18 | 1.89E-20 |
| 259      | 4.36E-27 | 3.89E-26 | 1.12E-26 | 259        | 4.81E-21 | 4.30E-18 | 2.86E-20 |
| 265      | 8.73E-27 | 7.11E-26 | 2.16E-26 | 265        | 6.85E-21 | 4.42E-18 | 3.72E-20 |
| 278      | 3.57E-26 | 2.43E-25 | 8.18E-26 | 278        | 1.41E-20 | 4.70E-18 | 6.39E-20 |
| 280      | 4.40E-26 | 2.91E-25 | 9.98E-26 | 280        | 1.56E-20 | 4.74E-18 | 6.92E-20 |
| 290      | 1.18E-25 | 6.89E-25 | 2.53E-25 | 290        | 2.59E-20 | 4.95E-18 | 1.01E-19 |
| 298      | 2.49E-25 | 1.33E-24 | 5.16E-25 | 298        | 3.81E-20 | 5.14E-18 | 1.35E-19 |
| 300      | 2.98E-25 | 1.55E-24 | 6.11E-25 | 300        | 4.19E-20 | 5.19E-18 | 1.46E-19 |
| 310      | 7.14E-25 | 3.33E-24 | 1.40E-24 | 310        | 6.55E-20 | 5.42E-18 | 2.04E-19 |
| 320      | 1.63E-24 | 6.86E-24 | 3.06E-24 | 320        | 1.00E-19 | 5.68E-18 | 2.82E-19 |

Table S7: Bimolecular rate constant  $k_b$  in ( $\text{cm}^3 \text{ molecule}^{-1} \text{ sec}^{-1}$ ) for  $(\text{H}_2\text{O})_2$  catalyzed channels for OAT path for  $\text{CH}_2\text{OO} + \text{cis/trans-HONO}$  within temperature range 213-320K.

| cis-HONO |          |          |          | trans-HONO |          |          |          |
|----------|----------|----------|----------|------------|----------|----------|----------|
| Temp (K) | Path A   | Path B   | Path C   | Temp (K)   | Path A   | Path B   | Path C   |
| 213      | 1.86E-25 | 2.91E-26 | 4.74E-28 | 213        | 7.54E-21 | 3.16E-21 | 7.18E-23 |
| 216      | 2.46E-25 | 4.12E-26 | 7.32E-28 | 216        | 8.33E-21 | 3.54E-21 | 8.90E-23 |
| 219      | 3.22E-25 | 5.78E-26 | 1.11E-27 | 219        | 9.19E-21 | 3.96E-21 | 1.10E-22 |
| 224      | 5.04E-25 | 1.01E-25 | 2.22E-27 | 224        | 1.08E-20 | 4.75E-21 | 1.55E-22 |
| 235      | 1.26E-24 | 3.13E-25 | 9.07E-27 | 235        | 1.50E-20 | 6.93E-21 | 3.15E-22 |
| 250      | 3.90E-24 | 1.28E-24 | 5.19E-26 | 250        | 2.28E-20 | 1.11E-20 | 7.60E-22 |
| 259      | 7.27E-24 | 2.77E-24 | 1.35E-25 | 259        | 2.88E-20 | 1.45E-20 | 1.24E-21 |
| 265      | 1.08E-23 | 4.54E-24 | 2.49E-25 | 265        | 3.33E-20 | 1.71E-20 | 1.68E-21 |
| 278      | 2.41E-23 | 1.23E-23 | 8.56E-25 | 278        | 4.49E-20 | 2.41E-20 | 3.16E-21 |
| 280      | 2.72E-23 | 1.43E-23 | 1.03E-24 | 280        | 4.71E-20 | 2.54E-20 | 3.47E-21 |
| 290      | 4.78E-23 | 2.88E-23 | 2.45E-24 | 290        | 5.83E-20 | 3.24E-20 | 5.42E-21 |
| 298      | 7.34E-23 | 4.90E-23 | 4.73E-24 | 298        | 6.85E-20 | 3.90E-20 | 7.59E-21 |
| 300      | 8.14E-23 | 5.57E-23 | 5.54E-24 | 300        | 7.11E-20 | 4.07E-20 | 8.21E-21 |
| 310      | 1.34E-22 | 1.04E-22 | 1.20E-23 | 310        | 8.64E-20 | 5.08E-20 | 1.22E-20 |
| 320      | 2.16E-22 | 1.87E-22 | 2.47E-23 | 320        | 1.04E-19 | 6.26E-20 | 1.78E-20 |

Table S8: Termolecular rate constant  $k_t$  in ( $\text{cm}^6 \text{ molecule}^{-2} \text{ sec}^{-1}$ ) for  $\text{H}_2\text{O}$  catalyzed channels for SHAT-WM for  $\text{CH}_2\text{OO} + \text{cis-HONO}$  within temperature range 213-320K.

| Temp (K) | PATH A   |           |          |          | PATH B   |           |          |          | PATH C   |           |          |          |
|----------|----------|-----------|----------|----------|----------|-----------|----------|----------|----------|-----------|----------|----------|
|          | keq1     | keq2      | kuni     | kt       | keq1     | keq2      | kuni     | kt       | keq1     | keq2      | kuni     | kt       |
| 213      | 1.66E-18 | 1.8E-19   | 2.77E+03 | 8.28E-34 | 7.88E-20 | 3.791E-18 | 2.77E+03 | 8.28E-34 | 4.38E-19 | 6.828E-19 | 2.77E+03 | 8.28E-34 |
| 216      | 1.28E-18 | 1.415E-19 | 3.65E+03 | 6.59E-34 | 6.48E-20 | 2.786E-18 | 3.65E+03 | 6.59E-34 | 3.47E-19 | 5.203E-19 | 3.65E+03 | 6.59E-34 |
| 219      | 9.88E-19 | 1.121E-19 | 4.78E+03 | 5.29E-34 | 5.36E-20 | 2.065E-18 | 4.78E+03 | 5.29E-34 | 2.77E-19 | 3.996E-19 | 4.78E+03 | 5.29E-34 |
| 224      | 6.55E-19 | 7.705E-20 | 7.37E+03 | 3.72E-34 | 3.95E-20 | 1.277E-18 | 7.37E+03 | 3.72E-34 | 1.93E-19 | 2.618E-19 | 7.37E+03 | 3.72E-34 |
| 235      | 2.83E-19 | 3.585E-20 | 1.80E+04 | 1.82E-34 | 2.12E-20 | 4.787E-19 | 1.80E+04 | 1.82E-34 | 9.20E-20 | 1.104E-19 | 1.80E+04 | 1.82E-34 |
| 250      | 1.03E-19 | 1.415E-20 | 5.36E+04 | 7.77E-35 | 9.99E-21 | 1.453E-19 | 5.36E+04 | 7.77E-35 | 3.74E-20 | 3.877E-20 | 5.36E+04 | 7.77E-35 |
| 259      | 5.92E-20 | 8.557E-21 | 9.72E+04 | 4.92E-35 | 6.65E-21 | 7.619E-20 | 9.72E+04 | 4.92E-35 | 2.30E-20 | 2.203E-20 | 9.72E+04 | 4.92E-35 |
| 265      | 4.20E-20 | 6.243E-21 | 1.42E+05 | 3.71E-35 | 5.15E-21 | 5.084E-20 | 1.42E+05 | 3.71E-35 | 1.69E-20 | 1.546E-20 | 1.42E+05 | 3.71E-35 |
| 278      | 2.10E-20 | 3.315E-21 | 3.02E+05 | 2.11E-35 | 3.09E-21 | 2.255E-20 | 3.02E+05 | 2.11E-35 | 9.17E-21 | 7.6E-21   | 3.02E+05 | 2.11E-35 |
| 280      | 1.90E-20 | 3.024E-21 | 3.38E+05 | 1.94E-35 | 2.87E-21 | 2.004E-20 | 3.38E+05 | 1.94E-35 | 8.39E-21 | 6.857E-21 | 3.38E+05 | 1.94E-35 |
| 290      | 1.18E-20 | 1.95E-21  | 5.75E+05 | 1.32E-35 | 2.02E-21 | 1.14E-20  | 5.75E+05 | 1.32E-35 | 5.48E-21 | 4.195E-21 | 5.75E+05 | 1.32E-35 |
| 298      | 8.25E-21 | 1.405E-21 | 8.58E+05 | 9.94E-36 | 1.55E-21 | 7.478E-21 | 8.58E+05 | 9.94E-36 | 3.99E-21 | 2.906E-21 | 8.58E+05 | 9.94E-36 |
| 300      | 7.57E-21 | 1.298E-21 | 9.45E+05 | 9.28E-36 | 1.45E-21 | 6.755E-21 | 9.45E+05 | 9.28E-36 | 3.69E-21 | 2.66E-21  | 9.45E+05 | 9.28E-36 |
| 310      | 5.01E-21 | 8.887E-22 | 1.50E+06 | 6.70E-36 | 1.07E-21 | 4.149E-21 | 1.50E+06 | 6.70E-36 | 2.56E-21 | 1.741E-21 | 1.50E+06 | 6.70E-36 |
| 320      | 3.41E-21 | 6.244E-22 | 2.33E+06 | 4.96E-36 | 8.09E-22 | 2.634E-21 | 2.33E+06 | 4.96E-36 | 1.82E-21 | 1.174E-21 | 2.33E+06 | 4.96E-36 |



Table S9: Termolecular rate constant  $k_t$  in ( $\text{cm}^6 \text{ molecule}^{-2} \text{ sec}^{-1}$ ) for  $\text{H}_2\text{O}$  catalyzed channels for SHAT-WM for  $\text{CH}_2\text{OO} + \text{trans-HONO}$  within temperature range 213-320K.

| Temp (K) | PATH A    |           |          |          | PATH B   |           |          |          | PATH C   |           |          |          |
|----------|-----------|-----------|----------|----------|----------|-----------|----------|----------|----------|-----------|----------|----------|
|          | keq1      | keq2      | kuni     | kt       | keq1     | keq2      | kuni     | kt       | keq1     | keq2      | kuni     | kt       |
| 213      | 6.186E-18 | 6.674E-18 | 9.04E+02 | 3.73E-32 | 3.10E-22 | 1.33E-13  | 9.04E+02 | 3.73E-32 | 4.38E-19 | 9.433E-17 | 9.04E+02 | 3.73E-32 |
| 216      | 4.579E-18 | 5.106E-18 | 1.22E+03 | 2.85E-32 | 2.93E-22 | 7.988E-14 | 1.22E+03 | 2.85E-32 | 3.47E-19 | 6.738E-17 | 1.22E+03 | 2.85E-32 |
| 219      | 3.418E-18 | 3.937E-18 | 1.63E+03 | 2.19E-32 | 2.77E-22 | 4.866E-14 | 1.63E+03 | 2.19E-32 | 2.77E-19 | 4.86E-17  | 1.63E+03 | 2.19E-32 |
| 224      | 2.139E-18 | 2.593E-18 | 2.60E+03 | 1.44E-32 | 2.53E-22 | 2.194E-14 | 2.60E+03 | 1.44E-32 | 1.93E-19 | 2.877E-17 | 2.60E+03 | 1.44E-32 |
| 235      | 8.209E-19 | 1.105E-18 | 6.80E+03 | 6.17E-33 | 2.11E-22 | 4.297E-15 | 6.80E+03 | 6.17E-33 | 9.20E-20 | 9.859E-18 | 6.80E+03 | 6.17E-33 |
| 250      | 2.565E-19 | 3.916E-19 | 2.20E+04 | 2.21E-33 | 1.71E-22 | 5.884E-16 | 2.20E+04 | 2.21E-33 | 3.74E-20 | 2.685E-18 | 2.20E+04 | 2.21E-33 |
| 259      | 1.366E-19 | 2.233E-19 | 4.17E+04 | 1.27E-33 | 1.53E-22 | 1.998E-16 | 4.17E+04 | 1.27E-33 | 2.30E-20 | 1.328E-18 | 4.17E+04 | 1.27E-33 |
| 265      | 9.207E-20 | 1.571E-19 | 6.24E+04 | 9.03E-34 | 1.43E-22 | 1.014E-16 | 6.24E+04 | 9.03E-34 | 1.69E-20 | 8.538E-19 | 6.24E+04 | 9.03E-34 |
| 278      | 4.165E-20 | 7.743E-20 | 1.41E+05 | 4.54E-34 | 1.25E-22 | 2.583E-17 | 1.41E+05 | 4.54E-34 | 9.17E-21 | 3.517E-19 | 1.41E+05 | 4.54E-34 |
| 280      | 3.712E-20 | 6.988E-20 | 1.58E+05 | 4.11E-34 | 1.23E-22 | 2.117E-17 | 1.58E+05 | 4.11E-34 | 8.39E-21 | 3.092E-19 | 1.58E+05 | 4.11E-34 |
| 290      | 2.141E-20 | 4.279E-20 | 2.79E+05 | 2.56E-34 | 1.12E-22 | 8.172E-18 | 2.79E+05 | 2.56E-34 | 5.48E-21 | 1.671E-19 | 2.79E+05 | 2.56E-34 |
| 298      | 1.419E-20 | 2.965E-20 | 4.28E+05 | 1.80E-34 | 1.05E-22 | 4.001E-18 | 4.28E+05 | 1.80E-34 | 3.99E-21 | 1.055E-19 | 4.28E+05 | 1.80E-34 |
| 300      | 1.285E-20 | 2.714E-20 | 4.74E+05 | 1.65E-34 | 1.04E-22 | 3.367E-18 | 4.74E+05 | 1.65E-34 | 3.69E-21 | 9.438E-20 | 4.74E+05 | 1.65E-34 |
| 310      | 7.982E-21 | 1.777E-20 | 7.79E+05 | 1.10E-34 | 9.64E-23 | 1.471E-18 | 7.79E+05 | 1.10E-34 | 2.56E-21 | 5.544E-20 | 7.79E+05 | 1.10E-34 |
| 320      | 5.121E-21 | 1.197E-20 | 1.24E+06 | 7.60E-35 | 9.04E-23 | 6.781E-19 | 1.24E+06 | 7.59E-35 | 1.82E-21 | 3.375E-20 | 1.24E+06 | 7.60E-35 |

Table S10: Termolecular rate constant  $k_t$  in ( $\text{cm}^6 \text{ molecule}^{-2} \text{ sec}^{-1}$ ) for  $\text{H}_2\text{O}$  catalyzed channels for DHAT-WM for  $\text{CH}_2\text{OO} + \text{cis-HONO}$  within temperature range 213-320K.

| Temp (K) | PATH A   |          |          |          | PATH B   |          |          |          | PATH C   |          |          |          |
|----------|----------|----------|----------|----------|----------|----------|----------|----------|----------|----------|----------|----------|
|          | keq1     | keq2     | kuni     | kt       | keq1     | keq2     | kuni     | kt       | keq1     | keq2     | kuni     | kt       |
| 213      | 1.66E-18 | 1.35E-17 | 3.48E+07 | 7.78E-28 | 7.88E-20 | 2.84E-16 | 3.48E+07 | 7.78E-28 | 4.38E-19 | 5.11E-17 | 3.48E+07 | 7.78E-28 |
| 216      | 1.28E-18 | 1.02E-17 | 3.80E+07 | 4.93E-28 | 6.48E-20 | 2.00E-16 | 3.80E+07 | 4.92E-28 | 3.47E-19 | 3.74E-17 | 3.80E+07 | 4.93E-28 |
| 219      | 9.88E-19 | 7.73E-18 | 4.10E+07 | 3.13E-28 | 5.36E-20 | 1.43E-16 | 4.10E+07 | 3.13E-28 | 2.77E-19 | 2.76E-17 | 4.10E+07 | 3.13E-28 |
| 224      | 6.55E-19 | 4.99E-18 | 4.70E+07 | 1.54E-28 | 3.95E-20 | 8.27E-17 | 4.70E+07 | 1.54E-28 | 1.93E-19 | 1.70E-17 | 4.70E+07 | 1.54E-28 |
| 235      | 2.83E-19 | 2.03E-18 | 6.20E+07 | 3.57E-29 | 2.12E-20 | 2.72E-17 | 6.20E+07 | 3.57E-29 | 9.20E-20 | 6.26E-18 | 6.20E+07 | 3.57E-29 |
| 250      | 1.03E-19 | 6.81E-19 | 8.73E+07 | 6.10E-30 | 9.99E-21 | 6.99E-18 | 8.73E+07 | 6.10E-30 | 3.74E-20 | 1.87E-18 | 8.73E+07 | 6.10E-30 |
| 259      | 5.92E-20 | 3.76E-19 | 1.05E+08 | 2.35E-30 | 6.65E-21 | 3.35E-18 | 1.05E+08 | 2.35E-30 | 2.30E-20 | 9.69E-19 | 1.05E+08 | 2.35E-30 |
| 265      | 4.20E-20 | 2.59E-19 | 1.19E+08 | 1.29E-30 | 5.15E-21 | 2.11E-18 | 1.19E+08 | 1.29E-30 | 1.69E-20 | 6.42E-19 | 1.19E+08 | 1.29E-30 |
| 278      | 2.10E-20 | 1.23E-19 | 1.51E+08 | 3.89E-31 | 3.09E-21 | 8.33E-19 | 1.51E+08 | 3.89E-31 | 9.17E-21 | 2.81E-19 | 1.51E+08 | 3.89E-31 |
| 280      | 1.90E-20 | 1.10E-19 | 1.57E+08 | 3.27E-31 | 2.87E-21 | 7.28E-19 | 1.57E+08 | 3.27E-31 | 8.39E-21 | 2.49E-19 | 1.57E+08 | 3.27E-31 |
| 290      | 1.18E-20 | 6.53E-20 | 1.85E+08 | 1.43E-31 | 2.02E-21 | 3.82E-19 | 1.85E+08 | 1.43E-31 | 5.48E-21 | 1.40E-19 | 1.85E+08 | 1.43E-31 |
| 298      | 8.25E-21 | 4.42E-20 | 2.11E+08 | 7.68E-32 | 1.55E-21 | 2.35E-19 | 2.11E+08 | 7.68E-32 | 3.99E-21 | 9.13E-20 | 2.11E+08 | 7.68E-32 |
| 300      | 7.57E-21 | 4.02E-20 | 2.18E+08 | 6.63E-32 | 1.45E-21 | 2.09E-19 | 2.18E+08 | 6.63E-32 | 3.69E-21 | 8.24E-20 | 2.18E+08 | 6.63E-32 |
| 310      | 5.01E-21 | 2.56E-20 | 2.52E+08 | 3.22E-32 | 1.07E-21 | 1.19E-19 | 2.52E+08 | 3.23E-32 | 2.56E-21 | 5.01E-20 | 2.52E+08 | 3.22E-32 |
| 320      | 3.41E-21 | 1.68E-20 | 2.90E+08 | 1.66E-32 | 8.09E-22 | 7.07E-20 | 2.90E+08 | 1.66E-32 | 1.82E-21 | 3.15E-20 | 2.90E+08 | 1.66E-32 |

Table S11: Termolecular rate constant  $k_t$  in ( $\text{cm}^6 \text{ molecule}^{-2} \text{ sec}^{-1}$ ) for  $\text{H}_2\text{O}$  catalyzed channels for DHAT-WM for  $\text{CH}_2\text{OO} + \text{trans-HONO}$  within temperature range 213-320K.

| Temp (K) | PATH A    |           |          |          | PATH B   |          |          |          | PATH C   |          |          |          |
|----------|-----------|-----------|----------|----------|----------|----------|----------|----------|----------|----------|----------|----------|
|          | keq1      | keq2      | kuni     | kt       | keq1     | keq2     | kuni     | kt       | keq1     | keq2     | kuni     | kt       |
| 213      | 6.186E-18 | 1.047E-17 | 7.88E+07 | 5.10E-27 | 3.10E-22 | 2.09E-13 | 7.88E+07 | 5.10E-27 | 4.38E-19 | 1.48E-16 | 7.88E+07 | 5.10E-27 |
| 216      | 4.579E-18 | 7.965E-18 | 8.57E+07 | 3.13E-27 | 2.93E-22 | 1.25E-13 | 8.57E+07 | 3.13E-27 | 3.47E-19 | 1.05E-16 | 8.57E+07 | 3.13E-27 |
| 219      | 3.418E-18 | 6.107E-18 | 9.31E+07 | 1.94E-27 | 2.77E-22 | 7.55E-14 | 9.31E+07 | 1.94E-27 | 2.77E-19 | 7.54E-17 | 9.31E+07 | 1.94E-27 |
| 224      | 2.139E-18 | 3.986E-18 | 1.06E+08 | 9.06E-28 | 2.53E-22 | 3.37E-14 | 1.06E+08 | 9.07E-28 | 1.93E-19 | 4.42E-17 | 1.06E+08 | 9.06E-28 |
| 235      | 8.209E-19 | 1.665E-18 | 1.40E+08 | 1.91E-28 | 2.11E-22 | 6.48E-15 | 1.40E+08 | 1.91E-28 | 9.20E-20 | 1.49E-17 | 1.40E+08 | 1.91E-28 |
| 250      | 2.565E-19 | 5.754E-19 | 1.95E+08 | 2.88E-29 | 1.71E-22 | 8.65E-16 | 1.95E+08 | 2.88E-29 | 3.74E-20 | 3.95E-18 | 1.95E+08 | 2.88E-29 |
| 259      | 1.366E-19 | 3.233E-19 | 2.34E+08 | 1.03E-29 | 1.53E-22 | 2.89E-16 | 2.34E+08 | 1.03E-29 | 2.30E-20 | 1.92E-18 | 2.34E+08 | 1.03E-29 |
| 265      | 9.207E-20 | 2.252E-19 | 2.62E+08 | 5.44E-30 | 1.43E-22 | 1.45E-16 | 2.62E+08 | 5.44E-30 | 1.69E-20 | 1.22E-18 | 2.62E+08 | 5.44E-30 |
| 278      | 4.165E-20 | 1.088E-19 | 3.30E+08 | 1.50E-30 | 1.25E-22 | 3.63E-17 | 3.30E+08 | 1.50E-30 | 9.17E-21 | 4.94E-19 | 3.30E+08 | 1.50E-30 |
| 280      | 3.712E-20 | 9.786E-20 | 3.42E+08 | 1.24E-30 | 1.23E-22 | 2.97E-17 | 3.42E+08 | 1.24E-30 | 8.39E-21 | 4.33E-19 | 3.42E+08 | 1.24E-30 |
| 290      | 2.141E-20 | 5.903E-20 | 4.01E+08 | 5.07E-31 | 1.12E-22 | 1.13E-17 | 4.01E+08 | 5.07E-31 | 5.48E-21 | 2.31E-19 | 4.01E+08 | 5.07E-31 |
| 298      | 1.419E-20 | 4.042E-20 | 4.53E+08 | 2.60E-31 | 1.05E-22 | 5.45E-18 | 4.53E+08 | 2.60E-31 | 3.99E-21 | 1.44E-19 | 4.53E+08 | 2.60E-31 |
| 300      | 1.285E-20 | 3.689E-20 | 4.67E+08 | 2.21E-31 | 1.04E-22 | 4.58E-18 | 4.67E+08 | 2.21E-31 | 3.69E-21 | 1.28E-19 | 4.67E+08 | 2.21E-31 |
| 310      | 7.982E-21 | 2.381E-20 | 5.37E+08 | 1.02E-31 | 9.64E-23 | 1.97E-18 | 5.37E+08 | 1.02E-31 | 2.56E-21 | 7.43E-20 | 5.37E+08 | 1.02E-31 |
| 320      | 5.121E-21 | 1.582E-20 | 6.13E+08 | 4.96E-32 | 9.04E-23 | 8.96E-19 | 6.13E+08 | 4.96E-32 | 1.82E-21 | 4.46E-20 | 6.13E+08 | 4.96E-32 |

Table S12: Bimolecular rate constant  $k_b$  in ( $\text{cm}^3 \text{ molecule}^{-1} \text{ sec}^{-1}$ ) for  $\text{H}_2\text{O}$  catalyzed channels for SHAT-WM path for  $\text{CH}_2\text{OO} + \text{cis/trans-HONO}$  within temperature range 213-320K.

| cis-HONO |          |          |          | trans-HONO |          |          |          |
|----------|----------|----------|----------|------------|----------|----------|----------|
| Temp (K) | Path A   | Path B   | Path C   | Temp (K)   | Path A   | Path B   | Path C   |
| 213      | 4.98E-16 | 1.05E-14 | 1.89E-15 | 213        | 6.03E-15 | 1.20E-10 | 8.53E-14 |
| 216      | 5.17E-16 | 1.02E-14 | 1.90E-15 | 216        | 6.22E-15 | 9.74E-11 | 8.21E-14 |
| 219      | 5.36E-16 | 9.87E-15 | 1.91E-15 | 219        | 6.42E-15 | 7.93E-11 | 7.93E-14 |
| 224      | 5.68E-16 | 9.42E-15 | 1.93E-15 | 224        | 6.75E-15 | 5.71E-11 | 7.49E-14 |
| 235      | 6.44E-16 | 8.60E-15 | 1.98E-15 | 235        | 7.52E-15 | 2.92E-11 | 6.71E-14 |
| 250      | 7.58E-16 | 7.78E-15 | 2.08E-15 | 250        | 8.62E-15 | 1.30E-11 | 5.91E-14 |
| 259      | 8.32E-16 | 7.41E-15 | 2.14E-15 | 259        | 9.32E-15 | 8.34E-12 | 5.54E-14 |
| 265      | 8.84E-16 | 7.20E-15 | 2.19E-15 | 265        | 9.81E-15 | 6.33E-12 | 5.33E-14 |
| 278      | 1.00E-15 | 6.82E-15 | 2.30E-15 | 278        | 1.09E-14 | 3.63E-12 | 4.95E-14 |
| 280      | 1.02E-15 | 6.77E-15 | 2.32E-15 | 280        | 1.11E-14 | 3.35E-12 | 4.90E-14 |
| 290      | 1.12E-15 | 6.55E-15 | 2.41E-15 | 290        | 1.20E-14 | 2.28E-12 | 4.67E-14 |
| 298      | 1.20E-15 | 6.41E-15 | 2.49E-15 | 298        | 1.27E-14 | 1.71E-12 | 4.51E-14 |
| 300      | 1.23E-15 | 6.38E-15 | 2.51E-15 | 300        | 1.29E-14 | 1.60E-12 | 4.48E-14 |
| 310      | 1.34E-15 | 6.24E-15 | 2.62E-15 | 310        | 1.38E-14 | 1.15E-12 | 4.32E-14 |
| 320      | 1.45E-15 | 6.13E-15 | 2.73E-15 | 320        | 1.48E-14 | 8.40E-13 | 4.18E-14 |

Table S13: Bimolecular rate constant  $k_b$  in ( $\text{cm}^3 \text{ molecule}^{-1} \text{ sec}^{-1}$ ) for  $\text{H}_2\text{O}$  catalyzed channels for DHAT-WM path for  $\text{CH}_2\text{OO} + \text{cis/trans-HONO}$  within temperature range 213-320K.

| cis-HONO |          |          |          | trans-HONO |          |          |          |
|----------|----------|----------|----------|------------|----------|----------|----------|
| Temp (K) | Path A   | Path B   | Path C   | Temp (K)   | Path A   | Path B   | Path C   |
| 213      | 4.68E-10 | 9.86E-09 | 1.78E-09 | 213        | 8.25E-10 | 1.64E-05 | 1.17E-08 |
| 216      | 3.86E-10 | 7.60E-09 | 1.42E-09 | 216        | 6.83E-10 | 1.07E-05 | 9.01E-09 |
| 219      | 3.17E-10 | 5.84E-09 | 1.13E-09 | 219        | 5.68E-10 | 7.03E-06 | 7.02E-09 |
| 224      | 2.34E-10 | 3.89E-09 | 7.97E-10 | 224        | 4.24E-10 | 3.59E-06 | 4.70E-09 |
| 235      | 1.26E-10 | 1.68E-09 | 3.88E-10 | 235        | 2.32E-10 | 9.04E-07 | 2.07E-09 |
| 250      | 5.95E-11 | 6.11E-10 | 1.63E-10 | 250        | 1.12E-10 | 1.69E-07 | 7.69E-10 |
| 259      | 3.96E-11 | 3.53E-10 | 1.02E-10 | 259        | 7.56E-11 | 6.76E-08 | 4.49E-10 |
| 265      | 3.08E-11 | 2.51E-10 | 7.63E-11 | 265        | 5.90E-11 | 3.81E-08 | 3.21E-10 |
| 278      | 1.85E-11 | 1.26E-10 | 4.24E-11 | 278        | 3.59E-11 | 1.20E-08 | 1.63E-10 |
| 280      | 1.72E-11 | 1.14E-10 | 3.90E-11 | 280        | 3.34E-11 | 1.01E-08 | 1.48E-10 |
| 290      | 1.21E-11 | 7.07E-11 | 2.60E-11 | 290        | 2.37E-11 | 4.52E-09 | 9.25E-11 |
| 298      | 9.31E-12 | 4.96E-11 | 1.93E-11 | 298        | 1.83E-11 | 2.47E-09 | 6.52E-11 |
| 300      | 8.76E-12 | 4.56E-11 | 1.80E-11 | 300        | 1.72E-11 | 2.14E-09 | 5.99E-11 |
| 310      | 6.43E-12 | 3.00E-11 | 1.26E-11 | 310        | 1.28E-11 | 1.06E-09 | 3.99E-11 |
| 320      | 4.86E-12 | 2.05E-11 | 9.14E-12 | 320        | 9.69E-12 | 5.49E-10 | 2.73E-11 |

Table S14: Termolecular rate constant  $k_t$  in ( $\text{cm}^6 \text{ molecule}^{-2} \text{ sec}^{-1}$ ) for  $(\text{H}_2\text{O})_2$  catalyzed channels for SHAT-WD for  $\text{CH}_2\text{OO} + \text{cis-HONO}$  within temperature range 213-320K.

| Temp (K) | PATH A    |           |          |          | PATH B    |           |          |          | PATH C    |           |          |          |
|----------|-----------|-----------|----------|----------|-----------|-----------|----------|----------|-----------|-----------|----------|----------|
|          | keq1      | keq2      | kuni     | kt       | keq1      | keq2      | kuni     | kt       | keq1      | keq2      | kuni     | kt       |
| 213      | 1.661E-18 | 2.658E-16 | 1.72E+02 | 7.57E-32 | 1.06E-17  | 4.166E-17 | 1.72E+02 | 7.58E-32 | 6.499E-16 | 6.792E-19 | 1.72E+02 | 7.57E-32 |
| 216      | 1.276E-18 | 1.748E-16 | 2.33E+02 | 5.19E-32 | 7.602E-18 | 2.933E-17 | 2.33E+02 | 5.19E-32 | 4.284E-16 | 5.205E-19 | 2.33E+02 | 5.19E-32 |
| 219      | 9.875E-19 | 1.163E-16 | 3.14E+02 | 3.60E-32 | 5.505E-18 | 2.086E-17 | 3.14E+02 | 3.60E-32 | 2.857E-16 | 4.019E-19 | 3.14E+02 | 3.60E-32 |
| 224      | 6.549E-19 | 6.041E-17 | 5.06E+02 | 2.00E-32 | 3.279E-18 | 1.207E-17 | 5.06E+02 | 2.00E-32 | 1.49E-16  | 2.656E-19 | 5.06E+02 | 2.00E-32 |
| 235      | 2.833E-19 | 1.58E-17  | 1.36E+03 | 6.07E-33 | 1.136E-18 | 3.942E-18 | 1.36E+03 | 6.08E-33 | 3.923E-17 | 1.141E-19 | 1.36E+03 | 6.07E-33 |
| 250      | 1.025E-19 | 3.08E-18  | 4.55E+03 | 1.43E-33 | 3.123E-19 | 1.011E-18 | 4.55E+03 | 1.44E-33 | 7.698E-18 | 4.102E-20 | 4.55E+03 | 1.44E-33 |
| 259      | 5.918E-20 | 1.267E-18 | 8.80E+03 | 6.60E-34 | 1.55E-19  | 4.838E-19 | 8.80E+03 | 6.60E-34 | 3.175E-18 | 2.361E-20 | 8.80E+03 | 6.60E-34 |
| 265      | 4.195E-20 | 7.251E-19 | 1.33E+04 | 4.06E-34 | 9.985E-20 | 3.046E-19 | 1.33E+04 | 4.06E-34 | 1.82E-18  | 1.671E-20 | 1.33E+04 | 4.06E-34 |
| 278      | 2.103E-20 | 2.356E-19 | 3.10E+04 | 1.53E-34 | 4.121E-20 | 1.202E-19 | 3.10E+04 | 1.53E-34 | 5.926E-19 | 8.359E-21 | 3.10E+04 | 1.53E-34 |
| 280      | 1.902E-20 | 2E-19     | 3.50E+04 | 1.33E-34 | 3.624E-20 | 1.05E-19  | 3.50E+04 | 1.33E-34 | 5.034E-19 | 7.561E-21 | 3.50E+04 | 1.33E-34 |
| 290      | 1.18E-20  | 9.147E-20 | 6.32E+04 | 6.82E-35 | 1.959E-20 | 5.506E-20 | 6.32E+04 | 6.81E-35 | 2.304E-19 | 4.683E-21 | 6.32E+04 | 6.82E-35 |
| 298      | 8.251E-21 | 5.086E-20 | 9.85E+04 | 4.13E-35 | 1.236E-20 | 3.395E-20 | 9.85E+04 | 4.13E-35 | 1.281E-19 | 3.275E-21 | 9.85E+04 | 4.13E-35 |
| 300      | 7.57E-21  | 4.414E-20 | 1.10E+05 | 3.66E-35 | 1.106E-20 | 3.022E-20 | 1.10E+05 | 3.67E-35 | 1.112E-19 | 3.005E-21 | 1.10E+05 | 3.66E-35 |
| 310      | 5.012E-21 | 2.236E-20 | 1.84E+05 | 2.06E-35 | 6.486E-21 | 1.728E-20 | 1.84E+05 | 2.06E-35 | 5.631E-20 | 1.99E-21  | 1.84E+05 | 2.06E-35 |
| 320      | 3.413E-21 | 1.183E-20 | 2.99E+05 | 1.21E-35 | 3.94E-21  | 1.025E-20 | 2.99E+05 | 1.21E-35 | 2.979E-20 | 1.356E-21 | 2.99E+05 | 1.21E-35 |

Table S15: Termolecular rate constant  $k_t$  in ( $\text{cm}^6 \text{ molecule}^{-2} \text{ sec}^{-1}$ ) for  $(\text{H}_2\text{O})_2$  catalyzed channels for SHAT-WD for  $\text{CH}_2\text{OO}$  + trans-HONO within temperature range 213-320K.

| Temp (K) | PATH A    |           |          |          |           | PATH B    |          |          |           |           | PATH C   |          |           |           |          |          |
|----------|-----------|-----------|----------|----------|-----------|-----------|----------|----------|-----------|-----------|----------|----------|-----------|-----------|----------|----------|
|          | keq1      | keq2      | kuni     | kt       |
| 213      | 6.186E-18 | 2.841E-17 | 1.48E+03 | 2.61E-31 | 1.476E-17 | 1.19E-17  | 1.48E+03 | 2.61E-31 | 6.499E-16 | 2.704E-19 | 1.48E+03 | 2.61E-31 | 6.499E-16 | 2.704E-19 | 1.48E+03 | 2.61E-31 |
| 216      | 4.579E-18 | 1.937E-17 | 2.00E+03 | 1.77E-31 | 1.078E-17 | 8.228E-18 | 2.00E+03 | 1.77E-31 | 4.284E-16 | 2.07E-19  | 2.00E+03 | 1.77E-31 | 4.284E-16 | 2.07E-19  | 2.00E+03 | 1.77E-31 |
| 219      | 3.418E-18 | 1.335E-17 | 2.67E+03 | 1.22E-31 | 7.941E-18 | 5.745E-18 | 2.67E+03 | 1.22E-31 | 2.857E-16 | 1.597E-19 | 2.67E+03 | 1.22E-31 | 2.857E-16 | 1.597E-19 | 2.67E+03 | 1.22E-31 |
| 224      | 2.139E-18 | 7.337E-18 | 4.27E+03 | 6.70E-32 | 4.863E-18 | 3.227E-18 | 4.27E+03 | 6.70E-32 | 1.49E-16  | 1.053E-19 | 4.27E+03 | 6.70E-32 | 1.49E-16  | 1.053E-19 | 4.27E+03 | 6.70E-32 |
| 235      | 8.209E-19 | 2.153E-18 | 1.12E+04 | 1.98E-32 | 1.784E-18 | 9.91E-19  | 1.12E+04 | 1.98E-32 | 3.923E-17 | 4.505E-20 | 1.12E+04 | 1.98E-32 | 3.923E-17 | 4.505E-20 | 1.12E+04 | 1.98E-32 |
| 250      | 2.565E-19 | 4.822E-19 | 3.68E+04 | 4.55E-33 | 5.262E-19 | 2.351E-19 | 3.68E+04 | 4.55E-33 | 7.698E-18 | 1.607E-20 | 3.68E+04 | 4.55E-33 | 7.698E-18 | 1.607E-20 | 3.68E+04 | 4.55E-33 |
| 259      | 1.366E-19 | 2.138E-19 | 7.05E+04 | 2.06E-33 | 2.714E-19 | 1.076E-19 | 7.05E+04 | 2.06E-33 | 3.175E-18 | 9.198E-21 | 7.05E+04 | 2.06E-33 | 3.175E-18 | 9.198E-21 | 7.05E+04 | 2.06E-33 |
| 265      | 9.207E-20 | 1.282E-19 | 1.06E+05 | 1.26E-33 | 1.792E-19 | 6.589E-20 | 1.06E+05 | 1.26E-33 | 1.82E-18  | 6.485E-21 | 1.06E+05 | 1.26E-33 | 1.82E-18  | 6.485E-21 | 1.06E+05 | 1.26E-33 |
| 278      | 4.165E-20 | 4.575E-20 | 2.45E+05 | 4.66E-34 | 7.767E-20 | 2.453E-20 | 2.45E+05 | 4.66E-34 | 5.926E-19 | 3.215E-21 | 2.45E+05 | 4.66E-34 | 5.926E-19 | 3.215E-21 | 2.45E+05 | 4.66E-34 |
| 280      | 3.712E-20 | 3.938E-20 | 2.76E+05 | 4.04E-34 | 6.88E-20  | 2.125E-20 | 2.76E+05 | 4.04E-34 | 5.034E-19 | 2.904E-21 | 2.76E+05 | 4.04E-34 | 5.034E-19 | 2.904E-21 | 2.76E+05 | 4.04E-34 |
| 290      | 2.141E-20 | 1.921E-20 | 4.95E+05 | 2.04E-34 | 3.85E-20  | 1.068E-20 | 4.95E+05 | 2.04E-34 | 2.304E-19 | 1.786E-21 | 4.95E+05 | 2.04E-34 | 2.304E-19 | 1.786E-21 | 4.95E+05 | 2.04E-34 |
| 298      | 1.419E-20 | 1.121E-20 | 7.70E+05 | 1.22E-34 | 2.492E-20 | 6.381E-21 | 7.70E+05 | 1.22E-34 | 1.281E-19 | 1.241E-21 | 7.70E+05 | 1.22E-34 | 1.281E-19 | 1.241E-21 | 7.70E+05 | 1.22E-34 |
| 300      | 1.285E-20 | 9.843E-21 | 8.56E+05 | 1.08E-34 | 2.244E-20 | 5.634E-21 | 8.56E+05 | 1.08E-34 | 1.112E-19 | 1.137E-21 | 8.56E+05 | 1.08E-34 | 1.112E-19 | 1.137E-21 | 8.56E+05 | 1.08E-34 |
| 310      | 7.982E-21 | 5.271E-21 | 1.43E+06 | 6.02E-35 | 1.357E-20 | 3.101E-21 | 1.43E+06 | 6.02E-35 | 5.631E-20 | 7.472E-22 | 1.43E+06 | 6.02E-35 | 5.631E-20 | 7.472E-22 | 1.43E+06 | 6.02E-35 |
| 320      | 5.121E-21 | 2.939E-21 | 2.32E+06 | 3.49E-35 | 8.483E-21 | 1.774E-21 | 2.32E+06 | 3.49E-35 | 2.979E-20 | 5.051E-22 | 2.32E+06 | 3.49E-35 | 2.979E-20 | 5.051E-22 | 2.32E+06 | 3.49E-35 |

Table S16: Termolecular rate constant  $k_t$  in ( $\text{cm}^6 \text{ molecule}^{-2} \text{ sec}^{-1}$ ) for  $(\text{H}_2\text{O})_2$  catalyzed channels for THAT-WD for  $\text{CH}_2\text{OO} + \text{cis-HONO}$  within temperature range 213-320K.

| Temp (K) | PATH A   |          |          |          | PATH B   |          |          |          | PATH C   |          |          |          |
|----------|----------|----------|----------|----------|----------|----------|----------|----------|----------|----------|----------|----------|
|          | keq1     | keq2     | kuni     | kt       | keq1     | keq2     | kuni     | kt       | keq1     | keq2     | kuni     | kt       |
| 213      | 1.66E-18 | 3.32E-15 | 8.27E+07 | 4.55E-25 | 1.06E-17 | 5.20E-16 | 8.27E+07 | 4.56E-25 | 6.50E-16 | 8.48E-18 | 8.27E+07 | 4.55E-25 |
| 216      | 1.28E-18 | 2.12E-15 | 8.98E+07 | 2.43E-25 | 7.60E-18 | 3.56E-16 | 8.98E+07 | 2.43E-25 | 4.28E-16 | 6.31E-18 | 8.98E+07 | 2.43E-25 |
| 219      | 9.88E-19 | 1.37E-15 | 9.73E+07 | 1.32E-25 | 5.51E-18 | 2.46E-16 | 9.73E+07 | 1.32E-25 | 2.86E-16 | 4.74E-18 | 9.73E+07 | 1.32E-25 |
| 224      | 6.55E-19 | 6.82E-16 | 1.11E+08 | 4.94E-26 | 3.28E-18 | 1.36E-16 | 1.11E+08 | 4.94E-26 | 1.49E-16 | 3.00E-18 | 1.11E+08 | 4.94E-26 |
| 235      | 2.83E-19 | 1.62E-16 | 1.44E+08 | 6.64E-27 | 1.14E-18 | 4.05E-17 | 1.44E+08 | 6.64E-27 | 3.92E-17 | 1.17E-18 | 1.44E+08 | 6.64E-27 |
| 250      | 1.03E-19 | 2.82E-17 | 1.99E+08 | 5.75E-28 | 3.12E-19 | 9.25E-18 | 1.99E+08 | 5.75E-28 | 7.70E-18 | 3.75E-19 | 1.99E+08 | 5.75E-28 |
| 259      | 5.92E-20 | 1.09E-17 | 2.37E+08 | 1.52E-28 | 1.55E-19 | 4.15E-18 | 2.37E+08 | 1.52E-28 | 3.18E-18 | 2.02E-19 | 2.37E+08 | 1.52E-28 |
| 265      | 4.20E-20 | 5.96E-18 | 2.64E+08 | 6.61E-29 | 9.99E-20 | 2.51E-18 | 2.64E+08 | 6.61E-29 | 1.82E-18 | 1.37E-19 | 2.64E+08 | 6.61E-29 |
| 278      | 2.10E-20 | 1.78E-18 | 3.30E+08 | 1.23E-29 | 4.12E-20 | 9.08E-19 | 3.30E+08 | 1.23E-29 | 5.93E-19 | 6.31E-20 | 3.30E+08 | 1.23E-29 |
| 280      | 1.90E-20 | 1.49E-18 | 3.40E+08 | 9.66E-30 | 3.62E-20 | 7.83E-19 | 3.40E+08 | 9.66E-30 | 5.03E-19 | 5.64E-20 | 3.40E+08 | 9.66E-30 |
| 290      | 1.18E-20 | 6.42E-19 | 3.97E+08 | 3.01E-30 | 1.96E-20 | 3.86E-19 | 3.97E+08 | 3.00E-30 | 2.30E-19 | 3.29E-20 | 3.97E+08 | 3.00E-30 |
| 298      | 8.25E-21 | 3.41E-19 | 4.45E+08 | 1.25E-30 | 1.24E-20 | 2.28E-19 | 4.45E+08 | 1.25E-30 | 1.28E-19 | 2.19E-20 | 4.45E+08 | 1.25E-30 |
| 300      | 7.57E-21 | 2.92E-19 | 4.57E+08 | 1.01E-30 | 1.11E-20 | 2.00E-19 | 4.57E+08 | 1.01E-30 | 1.11E-19 | 1.99E-20 | 4.57E+08 | 1.01E-30 |
| 310      | 5.01E-21 | 1.40E-19 | 5.22E+08 | 3.67E-31 | 6.49E-21 | 1.08E-19 | 5.22E+08 | 3.67E-31 | 5.63E-20 | 1.25E-20 | 5.22E+08 | 3.67E-31 |
| 320      | 3.41E-21 | 7.05E-20 | 5.91E+08 | 1.42E-31 | 3.94E-21 | 6.10E-20 | 5.91E+08 | 1.42E-31 | 2.98E-20 | 8.07E-21 | 5.91E+08 | 1.42E-31 |



Table S17: Termolecular rate constant  $k_t$  in ( $\text{cm}^6 \text{ molecule}^{-2} \text{ sec}^{-1}$ ) for  $(\text{H}_2\text{O})_2$  catalyzed channels for THAT-WD for  $\text{CH}_2\text{OO} + \text{trans-HONO}$  within temperature range 213-320K.

| Temp (K) | PATH A   |          |          |          | PATH B   |          |          |          | PATH C   |          |          |          |
|----------|----------|----------|----------|----------|----------|----------|----------|----------|----------|----------|----------|----------|
|          | keq1     | keq2     | kuni     | kt       | keq1     | keq2     | kuni     | kt       | keq1     | keq2     | kuni     | kt       |
| 213      | 6.19E-18 | 6.11E-14 | 7.63E+06 | 2.89E-24 | 1.48E-17 | 2.56E-14 | 7.63E+06 | 2.88E-24 | 6.50E-16 | 5.82E-16 | 7.63E+06 | 2.88E-24 |
| 216      | 4.58E-18 | 3.82E-14 | 8.55E+06 | 1.50E-24 | 1.08E-17 | 1.62E-14 | 8.55E+06 | 1.50E-24 | 4.28E-16 | 4.09E-16 | 8.55E+06 | 1.50E-24 |
| 219      | 3.42E-18 | 2.42E-14 | 9.54E+06 | 7.90E-25 | 7.94E-18 | 1.04E-14 | 9.54E+06 | 7.90E-25 | 2.86E-16 | 2.90E-16 | 9.54E+06 | 7.90E-25 |
| 224      | 2.14E-18 | 1.16E-14 | 1.14E+07 | 2.84E-25 | 4.86E-18 | 5.12E-15 | 1.14E+07 | 2.84E-25 | 1.49E-16 | 1.67E-16 | 1.14E+07 | 2.84E-25 |
| 235      | 8.21E-19 | 2.59E-15 | 1.64E+07 | 3.48E-26 | 1.78E-18 | 1.19E-15 | 1.64E+07 | 3.49E-26 | 3.92E-17 | 5.41E-17 | 1.64E+07 | 3.48E-26 |
| 250      | 2.57E-19 | 4.12E-16 | 2.56E+07 | 2.71E-27 | 5.26E-19 | 2.01E-16 | 2.56E+07 | 2.71E-27 | 7.70E-18 | 1.37E-17 | 2.56E+07 | 2.71E-27 |
| 259      | 1.37E-19 | 1.52E-16 | 3.26E+07 | 6.77E-28 | 2.71E-19 | 7.64E-17 | 3.26E+07 | 6.77E-28 | 3.18E-18 | 6.53E-18 | 3.26E+07 | 6.77E-28 |
| 265      | 9.21E-20 | 8.10E-17 | 3.80E+07 | 2.83E-28 | 1.79E-19 | 4.16E-17 | 3.80E+07 | 2.84E-28 | 1.82E-18 | 4.10E-18 | 3.80E+07 | 2.84E-28 |
| 278      | 4.17E-20 | 2.28E-17 | 5.17E+07 | 4.91E-29 | 7.77E-20 | 1.22E-17 | 5.17E+07 | 4.91E-29 | 5.93E-19 | 1.60E-18 | 5.17E+07 | 4.91E-29 |
| 280      | 3.71E-20 | 1.90E-17 | 5.40E+07 | 3.81E-29 | 6.88E-20 | 1.02E-17 | 5.40E+07 | 3.80E-29 | 5.03E-19 | 1.40E-18 | 5.40E+07 | 3.81E-29 |
| 290      | 2.14E-20 | 7.84E-18 | 6.69E+07 | 1.12E-29 | 3.85E-20 | 4.36E-18 | 6.69E+07 | 1.12E-29 | 2.30E-19 | 7.29E-19 | 6.69E+07 | 1.12E-29 |
| 298      | 1.42E-20 | 4.04E-18 | 7.86E+07 | 4.50E-30 | 2.49E-20 | 2.30E-18 | 7.86E+07 | 4.50E-30 | 1.28E-19 | 4.47E-19 | 7.86E+07 | 4.50E-30 |
| 300      | 1.29E-20 | 3.44E-18 | 8.17E+07 | 3.61E-30 | 2.24E-20 | 1.97E-18 | 8.17E+07 | 3.61E-30 | 1.11E-19 | 3.97E-19 | 8.17E+07 | 3.61E-30 |
| 310      | 7.98E-21 | 1.59E-18 | 9.83E+07 | 1.25E-30 | 1.36E-20 | 9.37E-19 | 9.83E+07 | 1.25E-30 | 5.63E-20 | 2.26E-19 | 9.83E+07 | 1.25E-30 |
| 320      | 5.12E-21 | 7.75E-19 | 1.17E+08 | 4.64E-31 | 8.48E-21 | 4.68E-19 | 1.17E+08 | 4.64E-31 | 2.98E-20 | 1.33E-19 | 1.17E+08 | 4.64E-31 |

Table S18: Bimolecular rate constant  $k_b$  in ( $\text{cm}^3 \text{ molecule}^{-1} \text{ sec}^{-1}$ ) for  $(\text{H}_2\text{O})_2$  catalyzed channels for SHAT-WD path for  $\text{CH}_2\text{OO} + \text{cis/trans-HONO}$  within temperature range 213-320K.

| cis-HONO |          |          |          | trans-HONO |          |          |          |
|----------|----------|----------|----------|------------|----------|----------|----------|
| Temp (K) | Path A   | Path B   | Path C   | Temp (K)   | Path A   | Path B   | Path C   |
| 213      | 4.56E-14 | 7.15E-15 | 1.17E-16 | 213        | 4.21E-14 | 1.77E-14 | 4.01E-16 |
| 216      | 4.07E-14 | 6.83E-15 | 1.21E-16 | 216        | 3.87E-14 | 1.64E-14 | 4.14E-16 |
| 219      | 3.65E-14 | 6.54E-15 | 1.26E-16 | 219        | 3.57E-14 | 1.54E-14 | 4.27E-16 |
| 224      | 3.06E-14 | 6.11E-15 | 1.35E-16 | 224        | 3.13E-14 | 1.38E-14 | 4.49E-16 |
| 235      | 2.14E-14 | 5.35E-15 | 1.55E-16 | 235        | 2.41E-14 | 1.11E-14 | 5.05E-16 |
| 250      | 1.40E-14 | 4.60E-15 | 1.86E-16 | 250        | 1.77E-14 | 8.65E-15 | 5.91E-16 |
| 259      | 1.11E-14 | 4.26E-15 | 2.08E-16 | 259        | 1.51E-14 | 7.59E-15 | 6.49E-16 |
| 265      | 9.67E-15 | 4.06E-15 | 2.23E-16 | 265        | 1.36E-14 | 7.01E-15 | 6.90E-16 |
| 278      | 7.30E-15 | 3.72E-15 | 2.59E-16 | 278        | 1.12E-14 | 6.00E-15 | 7.86E-16 |
| 280      | 7.01E-15 | 3.68E-15 | 2.65E-16 | 280        | 1.09E-14 | 5.87E-15 | 8.02E-16 |
| 290      | 5.78E-15 | 3.48E-15 | 2.96E-16 | 290        | 9.52E-15 | 5.29E-15 | 8.85E-16 |
| 298      | 5.01E-15 | 3.34E-15 | 3.23E-16 | 298        | 8.63E-15 | 4.91E-15 | 9.55E-16 |
| 300      | 4.84E-15 | 3.31E-15 | 3.30E-16 | 300        | 8.43E-15 | 4.83E-15 | 9.74E-16 |
| 310      | 4.11E-15 | 3.18E-15 | 3.66E-16 | 310        | 7.54E-15 | 4.44E-15 | 1.07E-15 |
| 320      | 3.54E-15 | 3.06E-15 | 4.05E-16 | 320        | 6.82E-15 | 4.12E-15 | 1.17E-15 |

Table S19: Bimolecular rate constant  $k_b$  in ( $\text{cm}^3 \text{ molecule}^{-1} \text{ sec}^{-1}$ ) for  $(\text{H}_2\text{O})_2$  catalyzed channels for THAT-WD path for  $\text{CH}_2\text{OO} + \text{cis/trans-HONO}$  within temperature range 213-320K.

| cis-HONO |          |          |          | trans-HONO |          |          |          |
|----------|----------|----------|----------|------------|----------|----------|----------|
| Temp (K) | Path A   | Path B   | Path C   | Temp (K)   | Path A   | Path B   | Path C   |
| 213      | 2.74E-07 | 4.30E-08 | 7.01E-10 | 213        | 4.66E-07 | 1.95E-07 | 4.44E-09 |
| 216      | 1.90E-07 | 3.20E-08 | 5.67E-10 | 216        | 3.27E-07 | 1.39E-07 | 3.49E-09 |
| 219      | 1.34E-07 | 2.39E-08 | 4.62E-10 | 219        | 2.31E-07 | 9.95E-08 | 2.77E-09 |
| 224      | 7.55E-08 | 1.51E-08 | 3.32E-10 | 224        | 1.33E-07 | 5.83E-08 | 1.90E-09 |
| 235      | 2.34E-08 | 5.84E-09 | 1.69E-10 | 235        | 4.24E-08 | 1.95E-08 | 8.88E-10 |
| 250      | 5.61E-09 | 1.84E-09 | 7.46E-11 | 250        | 1.06E-08 | 5.15E-09 | 3.52E-10 |
| 259      | 2.57E-09 | 9.83E-10 | 4.79E-11 | 259        | 4.96E-09 | 2.49E-09 | 2.13E-10 |
| 265      | 1.58E-09 | 6.62E-10 | 3.63E-11 | 265        | 3.08E-09 | 1.58E-09 | 1.56E-10 |
| 278      | 5.87E-10 | 2.99E-10 | 2.08E-11 | 278        | 1.18E-09 | 6.32E-10 | 8.29E-11 |
| 280      | 5.08E-10 | 2.67E-10 | 1.92E-11 | 280        | 1.03E-09 | 5.53E-10 | 7.56E-11 |
| 290      | 2.55E-10 | 1.53E-10 | 1.30E-11 | 290        | 5.25E-10 | 2.92E-10 | 4.88E-11 |
| 298      | 1.52E-10 | 1.01E-10 | 9.76E-12 | 298        | 3.17E-10 | 1.81E-10 | 3.51E-11 |
| 300      | 1.34E-10 | 9.16E-11 | 9.11E-12 | 300        | 2.81E-10 | 1.61E-10 | 3.25E-11 |
| 310      | 7.32E-11 | 5.66E-11 | 6.52E-12 | 310        | 1.57E-10 | 9.22E-11 | 2.22E-11 |
| 320      | 4.17E-11 | 3.61E-11 | 4.77E-12 | 320        | 9.06E-11 | 5.47E-11 | 1.56E-11 |

Table S20: Concentration of  $\text{H}_2\text{O}$  and  $(\text{H}_2\text{O})_2$  at 20% RH and 100% RH with in temperature range of 280-320 K

| Temp (K) | $[\text{H}_2\text{O}]$ |                        | $[(\text{H}_2\text{O})_2]$ |                        |
|----------|------------------------|------------------------|----------------------------|------------------------|
|          | 20% RH                 | 100% RH                | 20% RH                     | 100% RH                |
| 280      | $5.16 \times 10^{+16}$ | $2.58 \times 10^{+17}$ | $8.18 \times 10^{+12}$     | $2.04 \times 10^{+14}$ |
| 290      | $9.56 \times 10^{+16}$ | $4.78 \times 10^{+17}$ | $2.36 \times 10^{+13}$     | $5.91 \times 10^{+14}$ |
| 298      | $1.55 \times 10^{+17}$ | $7.73 \times 10^{+17}$ | $5.44 \times 10^{+13}$     | $1.36 \times 10^{+15}$ |
| 300      | $1.72 \times 10^{+17}$ | $8.58 \times 10^{+17}$ | $6.50 \times 10^{+13}$     | $1.62 \times 10^{+15}$ |
| 310      | $2.92 \times 10^{+17}$ | $1.46 \times 10^{+18}$ | $1.63 \times 10^{+14}$     | $4.06 \times 10^{+15}$ |
| 320      | $4.70 \times 10^{+17}$ | $2.35 \times 10^{+18}$ | $3.71 \times 10^{+14}$     | $9.24 \times 10^{+15}$ |

Table S21: Bimolecular rate constant  $k_{bi}$  (in  $\text{cm}^3 \text{ molecule}^{-1} \text{ s}^{-1}$ ) for uncatalyzed reaction of  $\text{CH}_2\text{OO} + \text{H}_2\text{O}$  within the temperature range 213–320 K.

| Temp (K) | $K_{eq}$ | $k_{uni}$ | $k_b$    |
|----------|----------|-----------|----------|
| 213      | 4.38E-19 | 6.85E+02  | 3.00E-16 |
| 216      | 3.47E-19 | 9.01E+02  | 3.13E-16 |
| 219      | 2.77E-19 | 1.18E+03  | 3.26E-16 |
| 224      | 1.93E-19 | 1.81E+03  | 3.48E-16 |
| 235      | 9.20E-20 | 4.34E+03  | 3.99E-16 |
| 250      | 3.74E-20 | 1.27E+04  | 4.73E-16 |
| 259      | 2.30E-20 | 2.26E+04  | 5.20E-16 |
| 265      | 1.69E-20 | 3.26E+04  | 5.51E-16 |
| 278      | 9.17E-21 | 6.79E+04  | 6.22E-16 |
| 280      | 8.39E-21 | 7.55E+04  | 6.33E-16 |
| 290      | 5.48E-21 | 1.26E+05  | 6.90E-16 |
| 298      | 3.99E-21 | 1.85E+05  | 7.36E-16 |
| 300      | 3.69E-21 | 2.03E+05  | 7.48E-16 |
| 310      | 2.56E-21 | 3.16E+05  | 8.08E-16 |
| 320      | 1.82E-21 | 4.78E+05  | 8.69E-16 |

Table S22: Termolecular rate constant  $k_t$  in ( $\text{cm}^6 \text{ molecule}^{-2} \text{ sec}^{-1}$ ) for reaction  $\text{CH}_2\text{OO} + \text{H}_2\text{O}$  catalyzed by HONO within temperature range 213-320K.

| Temp (K) | PATH A   |          |          |          | PATH B   |          |          |          | PATH C   |          |          |          |
|----------|----------|----------|----------|----------|----------|----------|----------|----------|----------|----------|----------|----------|
|          | keq1     | keq2     | kuni     | kt       | keq1     | keq2     | kuni     | kt       | keq1     | keq2     | kuni     | kt       |
| 213      | 1.66E-18 | 3.31E-18 | 3.17E+09 | 1.74E-26 | 7.88E-20 | 6.97E-17 | 3.17E+09 | 1.74E-26 | 4.38E-19 | 1.26E-17 | 3.17E+09 | 1.74E-26 |
| 216      | 1.28E-18 | 2.54E-18 | 3.37E+09 | 1.09E-26 | 6.48E-20 | 5.01E-17 | 3.37E+09 | 1.09E-26 | 3.47E-19 | 9.35E-18 | 3.37E+09 | 1.09E-26 |
| 219      | 9.88E-19 | 1.97E-18 | 3.57E+09 | 6.94E-27 | 5.36E-20 | 3.63E-17 | 3.57E+09 | 6.95E-27 | 2.77E-19 | 7.02E-18 | 3.57E+09 | 6.94E-27 |
| 224      | 6.55E-19 | 1.31E-18 | 3.92E+09 | 3.35E-27 | 3.95E-20 | 2.17E-17 | 3.92E+09 | 3.35E-27 | 1.93E-19 | 4.44E-18 | 3.92E+09 | 3.35E-27 |
| 235      | 2.83E-19 | 5.64E-19 | 4.74E+09 | 7.56E-28 | 2.12E-20 | 7.53E-18 | 4.74E+09 | 7.56E-28 | 9.20E-20 | 1.74E-18 | 4.74E+09 | 7.57E-28 |
| 250      | 1.03E-19 | 2.03E-19 | 5.95E+09 | 1.24E-28 | 9.99E-21 | 2.08E-18 | 5.95E+09 | 1.24E-28 | 3.74E-20 | 5.56E-19 | 5.95E+09 | 1.24E-28 |
| 259      | 5.92E-20 | 1.17E-19 | 6.72E+09 | 4.64E-29 | 6.65E-21 | 1.04E-18 | 6.72E+09 | 4.64E-29 | 2.30E-20 | 3.00E-19 | 6.72E+09 | 4.64E-29 |
| 265      | 4.20E-20 | 8.25E-20 | 7.26E+09 | 2.51E-29 | 5.15E-21 | 6.72E-19 | 7.26E+09 | 2.51E-29 | 1.69E-20 | 2.04E-19 | 7.26E+09 | 2.51E-29 |
| 278      | 2.10E-20 | 4.10E-20 | 8.45E+09 | 7.29E-30 | 3.09E-21 | 2.79E-19 | 8.45E+09 | 7.29E-30 | 9.17E-21 | 9.41E-20 | 8.45E+09 | 7.29E-30 |
| 280      | 1.90E-20 | 3.71E-20 | 8.64E+09 | 6.09E-30 | 2.87E-21 | 2.46E-19 | 8.64E+09 | 6.10E-30 | 8.39E-21 | 8.41E-20 | 8.64E+09 | 6.09E-30 |
| 290      | 1.18E-20 | 2.28E-20 | 9.60E+09 | 2.59E-30 | 2.02E-21 | 1.34E-19 | 9.60E+09 | 2.58E-30 | 5.48E-21 | 4.91E-20 | 9.60E+09 | 2.59E-30 |
| 298      | 8.25E-21 | 1.59E-20 | 1.04E+10 | 1.36E-30 | 1.55E-21 | 8.46E-20 | 1.04E+10 | 1.36E-30 | 3.99E-21 | 3.29E-20 | 1.04E+10 | 1.36E-30 |
| 300      | 7.57E-21 | 1.46E-20 | 1.06E+10 | 1.17E-30 | 1.45E-21 | 7.58E-20 | 1.06E+10 | 1.17E-30 | 3.69E-21 | 2.98E-20 | 1.06E+10 | 1.17E-30 |
| 310      | 5.01E-21 | 9.58E-21 | 1.16E+10 | 5.55E-31 | 1.07E-21 | 4.47E-20 | 1.16E+10 | 5.55E-31 | 2.56E-21 | 1.88E-20 | 1.16E+10 | 5.55E-31 |
| 320      | 3.41E-21 | 6.48E-21 | 1.26E+10 | 2.78E-31 | 8.09E-22 | 2.73E-20 | 1.26E+10 | 2.78E-31 | 1.82E-21 | 1.22E-20 | 1.26E+10 | 2.78E-31 |

Table S23: Bimolecular rate constant  $k_b$  in ( $\text{cm}^3 \text{ molecule}^{-1} \text{ sec}^{-1}$ ) for reaction  $\text{CH}_2\text{OO} + \text{H}_2\text{O}$  catalyzed by HONO within temperature range 213-320K.

| Temp (K) | Path A   | Path B   | Path C   |
|----------|----------|----------|----------|
| 213      | 1.05E-08 | 2.21E-07 | 3.99E-08 |
| 216      | 8.57E-09 | 1.69E-07 | 3.15E-08 |
| 219      | 7.03E-09 | 1.30E-07 | 2.51E-08 |
| 224      | 5.12E-09 | 8.49E-08 | 1.74E-08 |
| 235      | 2.67E-09 | 3.56E-08 | 8.22E-09 |
| 250      | 1.21E-09 | 1.24E-08 | 3.31E-09 |
| 259      | 7.84E-10 | 6.98E-09 | 2.02E-09 |
| 265      | 5.98E-10 | 4.87E-09 | 1.48E-09 |
| 278      | 3.47E-10 | 2.36E-09 | 7.95E-10 |
| 280      | 3.20E-10 | 2.12E-09 | 7.26E-10 |
| 290      | 2.19E-10 | 1.28E-09 | 4.72E-10 |
| 298      | 1.65E-10 | 8.78E-10 | 3.41E-10 |
| 300      | 1.54E-10 | 8.01E-10 | 3.16E-10 |
| 310      | 1.11E-10 | 5.17E-10 | 2.17E-10 |
| 320      | 8.14E-11 | 3.43E-10 | 1.53E-10 |

Table S24: Bimolecular rate constant  $k_b$  in ( $\text{cm}^3 \text{ molecule}^{-1} \text{ sec}^{-1}$ ) for  $\text{CH}_2\text{OO} + \text{H}_2\text{O}$  uncatalyzed reaction and  $k_{eff}$  for HONO catalyzed reaction in temperature range 280-320K.

| Temp (K) | $k_b^{uncat}$ | $k_{eff}$ |
|----------|---------------|-----------|
| 280      | 6.33E-16      | 6.09E-20  |
| 290      | 6.90E-16      | 2.59E-20  |
| 298      | 7.36E-16      | 1.36E-20  |
| 300      | 7.48E-16      | 1.17E-20  |
| 310      | 8.08E-16      | 5.55E-21  |
| 320      | 8.69E-16      | 2.78E-21  |

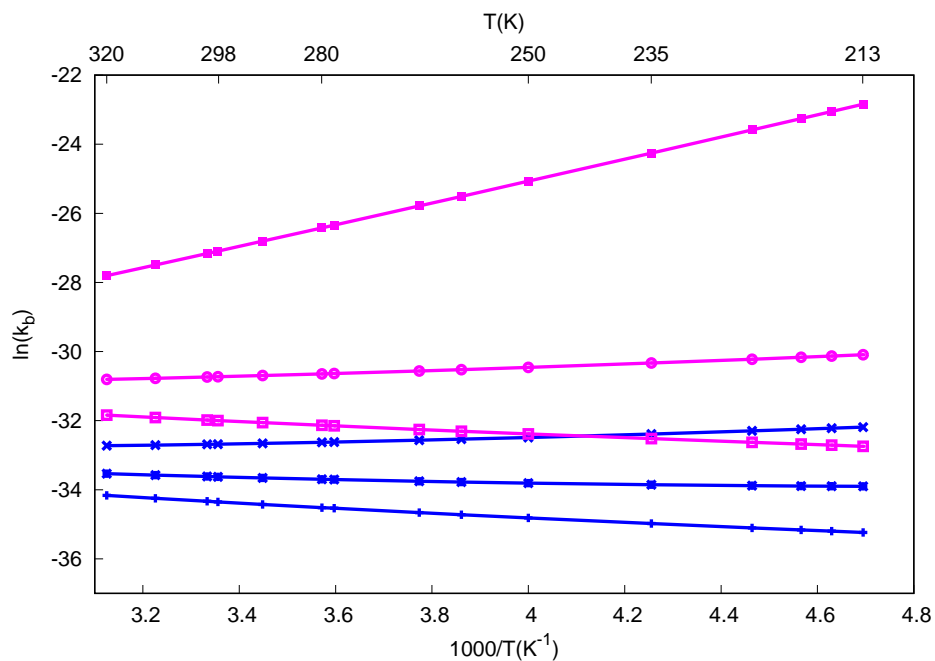

Figure S1: Arrhenius plot for SHAT-WM channel of the bimolecular rate constants ( $k_b$ ) for the  $\text{CH}_2\text{OO} + \text{cis/trans-HONO}$  reaction in presence of  $\text{H}_2\text{O}$  within the temperature range of 213 K to 320 K for the A(P1), path B(P2) and path C(P3).

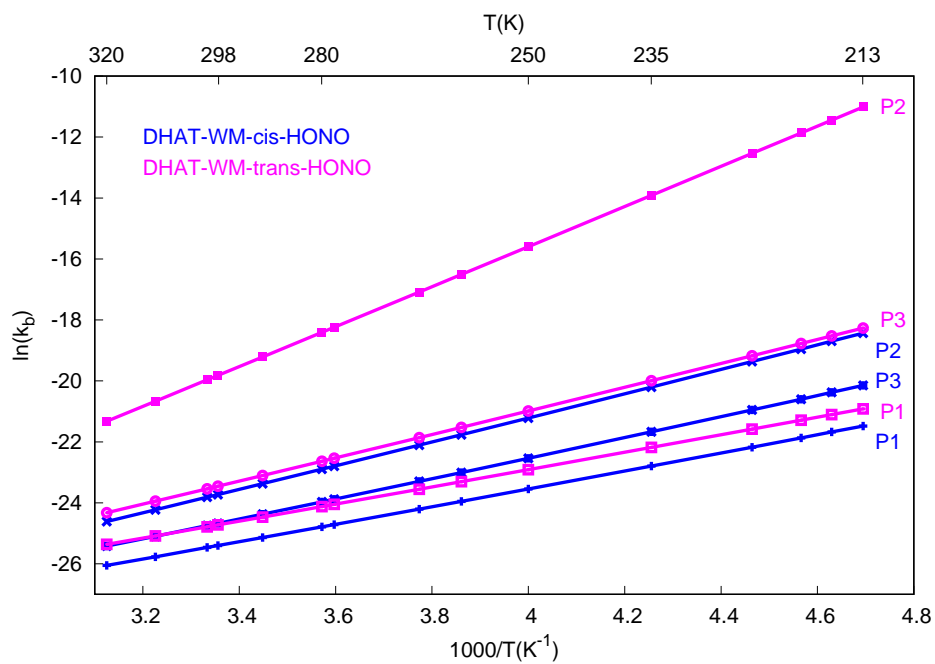

Figure S2: Arrhenius plot for DHAT-WM channel of the bimolecular rate constants ( $k_b$ ) for the  $\text{CH}_2\text{OO} + \text{cis/trans-HONO}$  reaction in presence of  $\text{H}_2\text{O}$  within the temperature range of 213 K to 320 K for the A(P1), path B(P2) and path C(P3).



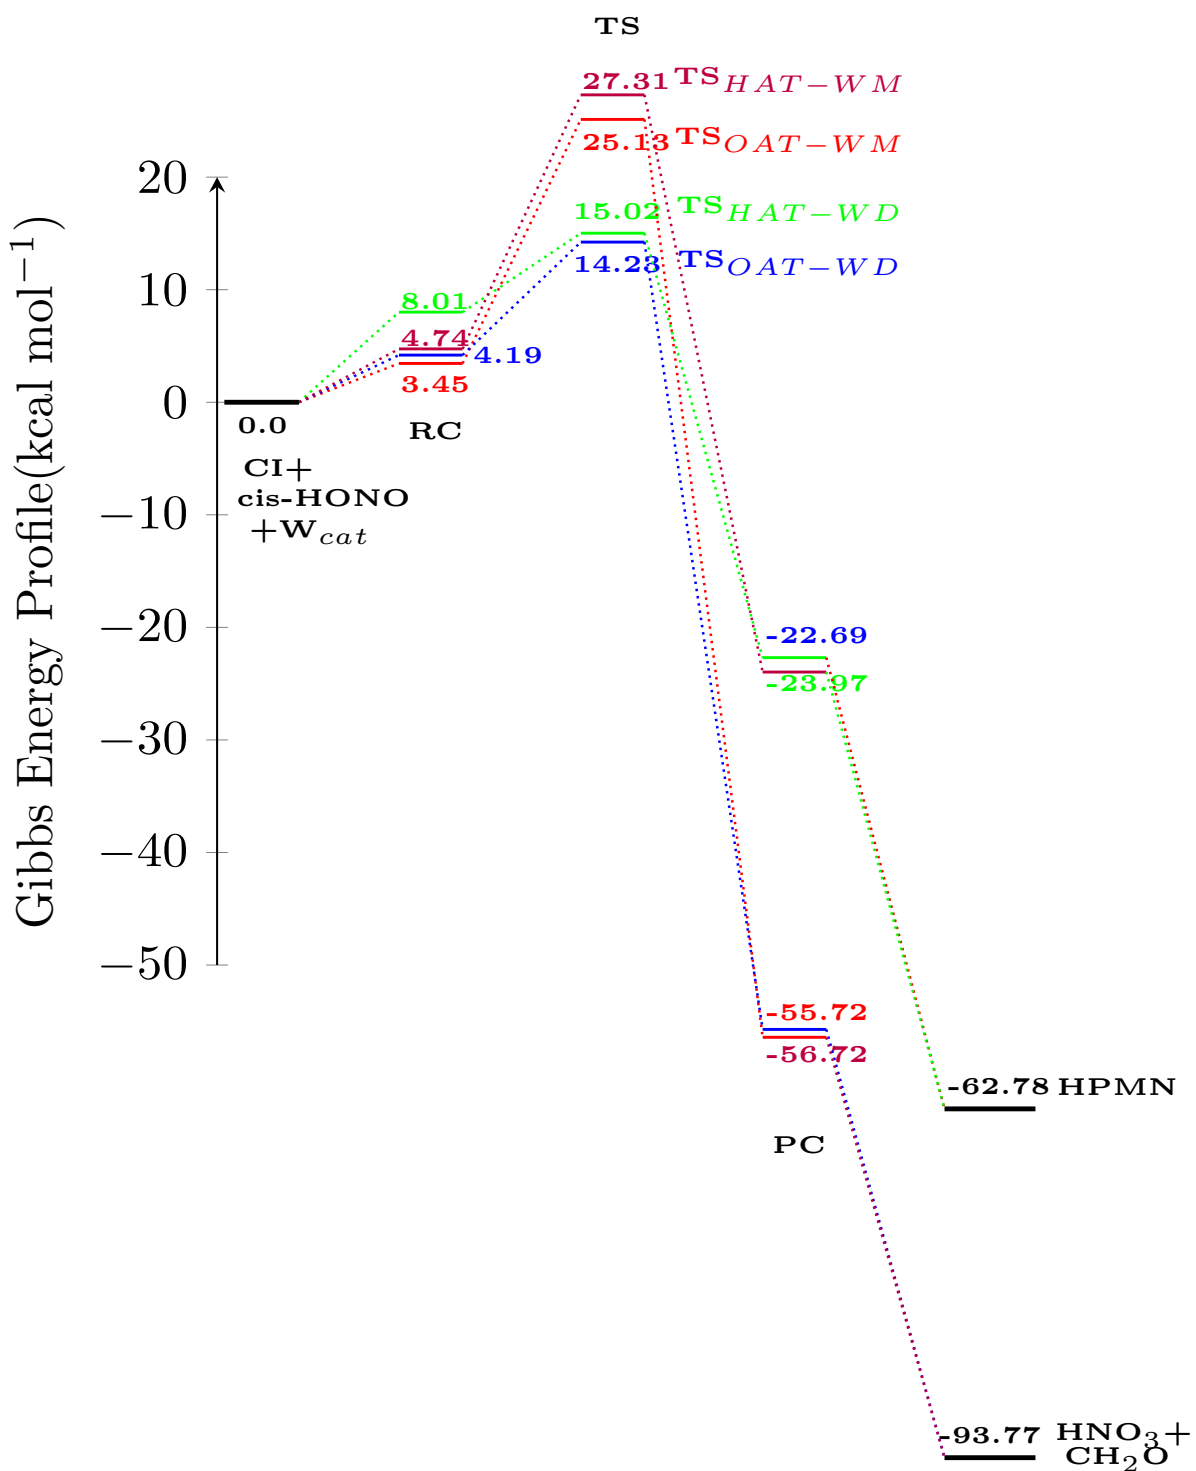

Figure S3: Gibbs free energy profile for CH<sub>2</sub>OO + cis-HONO reaction in presence of H<sub>2</sub>O and (H<sub>2</sub>O)<sub>2</sub> calculated at CCSD(T)/CBS//M06-2X/aug-cc-pVTZ level of theory.

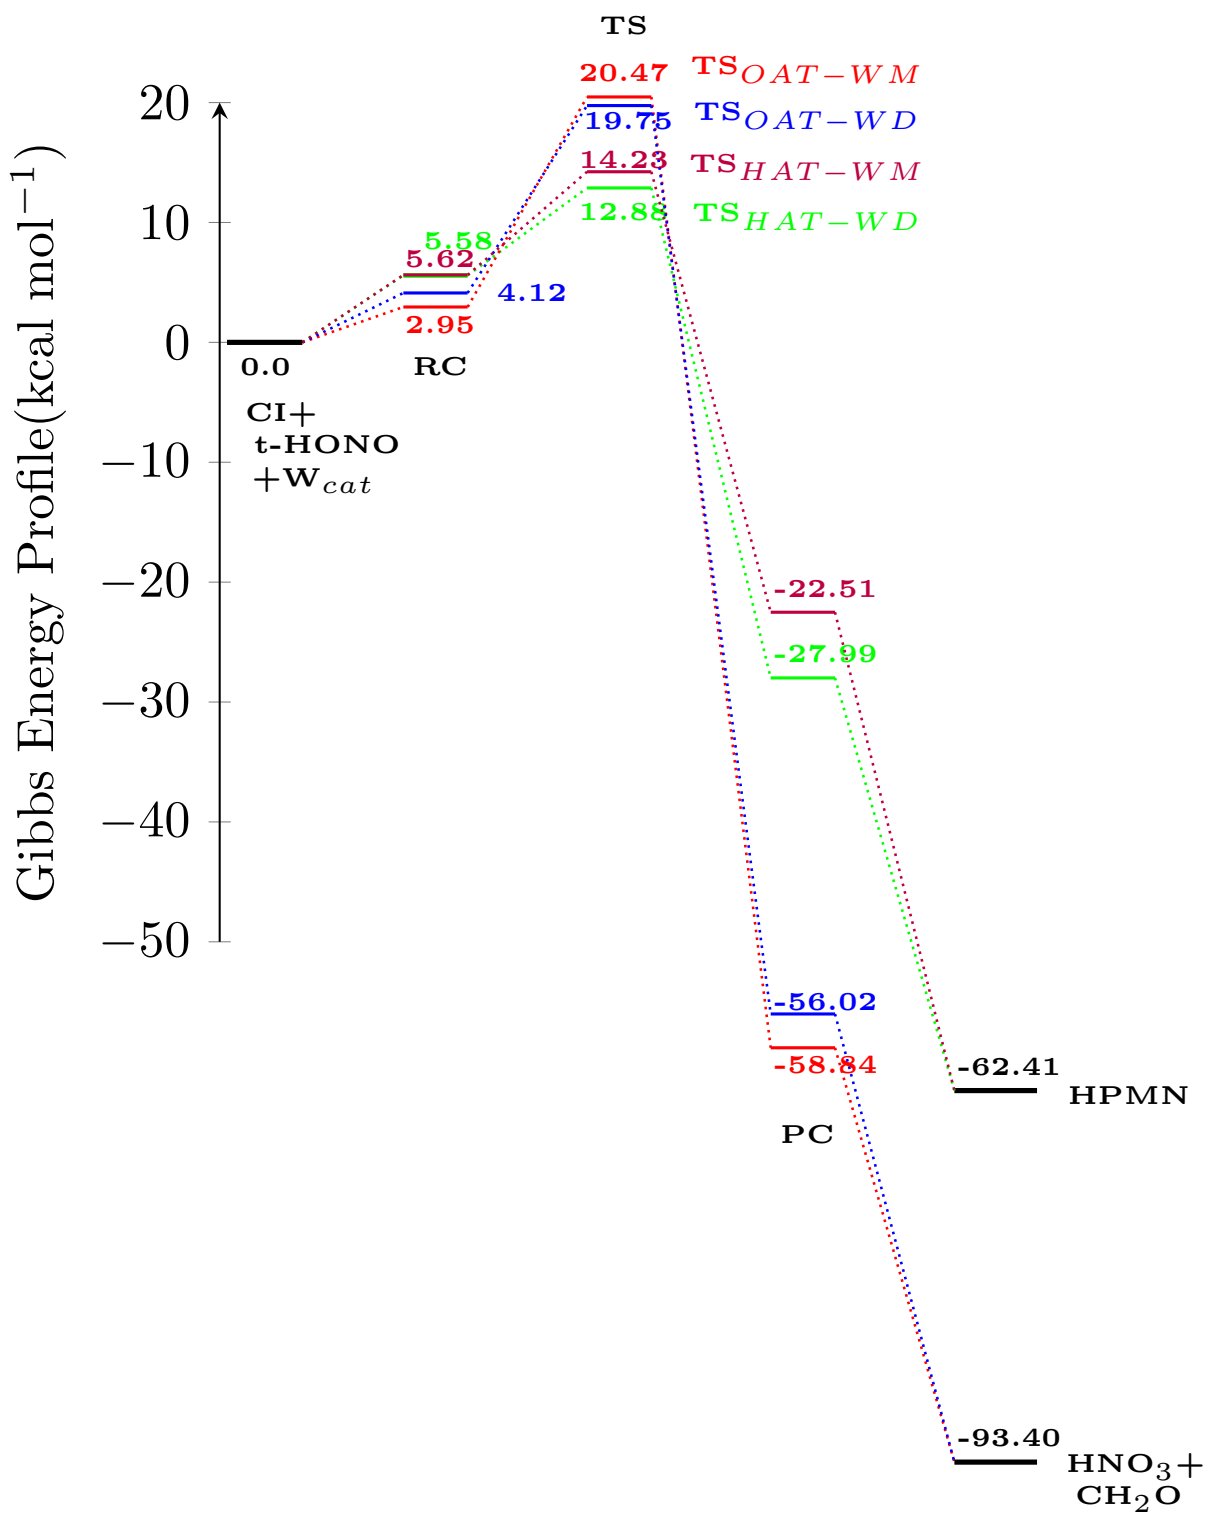

Figure S4: Gibbs free energy profile for  $\text{CH}_2\text{OO} + \text{trans-HONO}$  reaction in presence of  $\text{H}_2\text{O}$  and  $(\text{H}_2\text{O})_2$  calculated at CCSD(T)/CBS//M06-2X/aug-cc-pVTZ level of theory.

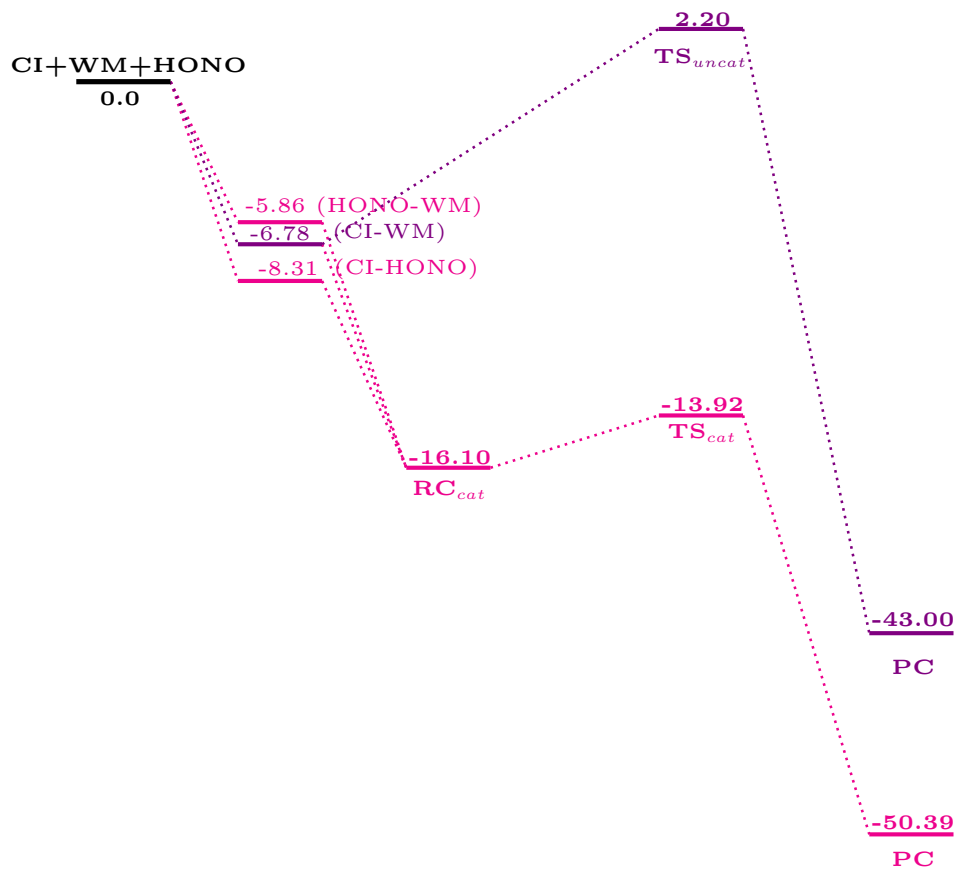

Figure S5: Potential free energy surface for  $\text{CH}_2\text{OO} + \text{H}_2\text{O}$  uncatalysed and HONO-catalyzed reaction calculated at CCSD(T)/CBS//M06-2X/aug-cc-pVTZ level of theory.
